1 Dynamic integration of forward planning and heuristic  
2 preferences during multiple goal pursuit

3

4 Florian Ott<sup>1\*</sup>, Dimitrije Marković<sup>1</sup>, Alexander Strobel<sup>1</sup>, Stefan J. Kiebel<sup>1</sup>

5 <sup>1</sup>Department of Psychology, Technische Universität Dresden, Germany

6

7 \* Corresponding author

8 E-Mail: [florian.ott@tu-dresden.de](mailto:florian.ott@tu-dresden.de) (FO)

9

10

11

12

13

14

15

16

17

18

19

20

21

22

23

24

25

26

## 27 **Abstract**

28 Selecting goals and successfully pursuing them in an uncertain and dynamic environment is an  
29 important aspect of human behaviour. In order to decide which goal to pursue at what point in time,  
30 one has to evaluate the consequences of one's actions over future time steps by forward planning.  
31 However, when the goal is still temporally distant, detailed forward planning can be prohibitively  
32 costly. One way to select actions at minimal computational costs is to use heuristics. It is an open  
33 question how humans mix heuristics with forward planning to balance computational costs with goal  
34 reaching performance. To test a hypothesis about dynamic mixing of heuristics with forward  
35 planning, we used a novel stochastic sequential two-goal task. Comparing participants' decisions  
36 with an optimal full planning agent, we found that at the early stages of goal-reaching sequences, in  
37 which both goals are temporally distant and planning complexity is high, on average 42% (SD =  
38 19%) of participants' choices deviated from the agent's optimal choices. Only towards the end of the  
39 sequence, participant's behaviour converged to near optimal performance. Subsequent model-based  
40 analyses showed that participants used heuristic preferences when the goal was temporally distant  
41 and switched to forward planning when the goal was close.

## 42 **Author summary**

43 When we pursue our goals, there is often a moment when we recognize that we did not make the  
44 progress that we hoped for. What should we do now? Persevere to achieve the original goal, or  
45 switch to another goal? Two features of real-world goal pursuit make these decisions particularly  
46 complex. First, goals can lie far into an unpredictable future and second, there are many potential  
47 goals to pursue. When potential goals are temporally distant, human decision makers cannot use an  
48 exhaustive planning strategy, rendering simpler rules of thumb more appropriate. An important  
49 question is how humans adjust the rule of thumb approach once they get closer to the goal. We  
50 addressed this question using a novel sequential two-goal task and analysed the choice data using a  
51 computational model which arbitrates between a rule of thumb and accurate planning. We found that  
52 participants' decision making progressively improved as the goal came closer and that this  
53 improvement was most likely caused by participants starting to plan ahead.

## 54 **Introduction**

55 Decisions of which goal to pursue at what point in time are central to everyday life [1-3]. Typically,  
56 in our dynamic environment, the outcomes of our decisions are stochastic and one cannot predict  
57 with certainty whether a preferred goal can be reached. Often, our environment also presents  
58 alternative goals that may be less preferred but can be reached with a higher probability than the  
59 preferred goal. For example, when working towards a specific dream position in a career, it may turn  
60 out after some time that the position is unlikely to be obtained, while another less preferred position  
61 can be secured. The decision to make is whether one should continue working towards the preferred  
62 position, or switch goals and secure the less preferred position. The risk when pursuing the preferred  
63 position is to lose out on both positions. This decision dilemma 'should I risk it and go after a big  
64 reward or play it safe and gain less?' is typical for many decisions we have to make in real life.  
65 Critically, for many such decisions, these binary choices do not emerge suddenly and unexpectedly,  
66 but the decision maker is typically confronted with such decisions after some prolonged period of  
67 time working towards enabling different options.

68 How would one choose one's actions during such a prolonged goal-reaching decision making  
69 sequence? One way, if the rules of the dynamic environment and its uncertainties are known, is to use

70 forward planning to always choose the actions which maximize the gain (see [4, 5] reviewing  
71 cognitive processes of forward planning). This would be the way one would program an optimal  
72 agent in a game or experimental task environment. This approach is often used in cognitive  
73 neuroscience to model the mechanism of how humans make decisions in temporally extended goal-  
74 reaching scenarios, (e.g. [6-9]).

75 However, the implicit assumption made in these decision-making models, namely that humans use  
76 detailed forward planning and compute the probabilities of reaching the goals, is difficult to justify,  
77 because of the involved computational complexity. In a stochastic environment, forward planning in  
78 artificial agents is typically achieved via sampling many possible policies (sequences of actions)  
79 which requires substantial computing power that scales exponentially with the number of future  
80 actions. In particular, when one is still temporally far from the goal, the computational burden of  
81 simulating trajectories into the future is the largest, while the usefulness of the resulting action  
82 selection is minimal: intuitively, in stochastic and sufficiently complex environments, anything may  
83 yet happen on the long way to the goal so the gain of planning ahead at high cost may be small. The  
84 importance of the balance between the benefits and its costs to better understand human decision  
85 making became a recent research focus, e.g., [10-14]. The question is how one can select actions over  
86 long stretches of time, without being exposed to the computational burden of forward planning or  
87 similar dynamic programming schemes.

88 One obvious way to select actions at minimal computational costs is to use heuristics that do not  
89 require forward planning towards a goal [15, 16], e.g. to always select the action towards a hard to  
90 achieve and highly rewarded goal. Clearly, this and other heuristics come with the drawback that they  
91 can be substantially suboptimal when close to the goal. For example, blindly working toward a hard  
92 to achieve goal would ignore the risk of not reaching any goal. Another solution is to use habit-like  
93 strategies to avoid computational costs [17]. However, habits are typically useful only when one  
94 encounters exactly the same situation or context repeatedly, while goal reaching in uncertain  
95 environments as presented here, often requires flexible behavioural control.

96 It is an open question how humans select their actions when the potentially reachable goals are still  
97 far away and forward planning is complex. We hypothesized that people use a mixture of two  
98 approaches to achieve an acceptable balance between outcome and computational costs. This mixture  
99 changes with temporal distance to the goal: when far from the goal, people use a prior goal  
100 preference to make their decision about which action to take. With this approach, one assumes that  
101 one will eventually reach the preferred goal and selects the action that, if one looked backward in  
102 time from the reached goal, is the most instrumental. When coming closer to the goal, one expects  
103 that the influence of the goal preference should be progressively superseded by computationally more  
104 expensive action selection using forward planning to optimally reach the preferred goal or, failing  
105 that one, to pursue policies to reach an alternative goal.

106 To test whether participants used such an approach, we employed a novel behavioural task where  
107 participants were placed in a dynamic and stochastic sequential decision task environment that  
108 emulated reaching goals over an extended time period. In miniblocks of 15 trials, participants had to  
109 make decisions to reach one or two goals, where reaching both goals was rewarded more than  
110 reaching only one. In each miniblock, it was also possible, if blindly trying to obtain the higher  
111 reward, to not reach any goal and not obtain any reward. While participants pass through the  
112 miniblock, both the remaining trials to the end of the miniblock and the complexity of forward  
113 planning decrease. This enables us to test and model whether participants switch from using  
114 heuristics to forward planning during goal-reaching. To analyse the behavioural data of 89

115 participants and test hypotheses, we used stochastic variational inference, which provided posterior  
116 beliefs about the goal strategy preference of each participant, among other free model parameters.  
117 We show that the heuristic goal strategy preference parameter is key to explain participants' choices  
118 when temporally distant from the goal, and how, when progressing towards a goal, this goal strategy  
119 preference interacts with optimal forward planning to achieve near-optimal performance.

## 120 **Methods**

### 121 **Participants**

122 Eighty-nine participants took part in the experiment (58 women, mean age = 24.8, SD = 7.1).  
123 Reimbursement was a fixed amount of 8€ or class credit plus a performance-dependent bonus (mean  
124 bonus = 3.88€, SD = 13.6). The study was approved by the Institutional Review Board of the  
125 Technische Universität Dresden and conducted in accordance to ethical standards of the Declaration  
126 of Helsinki. All participants were informed about the purpose and the procedure of the study and  
127 gave written informed consent prior to the experiment. All participants had normal or corrected-to-  
128 normal vision.

### 129 **Table 1. Glossary of abbreviations**

| Abbreviation | Explanation                                                                           |
|--------------|---------------------------------------------------------------------------------------|
| A, B         | Basic offers                                                                          |
| Ab, aB       | Mixed offers                                                                          |
| $Pts_t^A$    | A-points in trial t                                                                   |
| $Pts_t^B$    | B-points in trial t                                                                   |
| g1           | One-goal-choice = Sequential strategy choice = Choice that maximizes point difference |
| g2           | Two-goal-choice = Parallel strategy choice = Choice that minimizes point difference   |
| G1           | One-goal-success = One point scale above threshold after 15 trials                    |
| G2           | Two-goal-success = Both scales above threshold after 15 trials                        |
| Q(s,a)       | Action value = Expected future reward of a choice                                     |
| $Q_G(s,a)$   | Goal choice value = Expected future reward of a goal strategy choice                  |
| DEV          | Differential expected value = $Q_G(s, g2) - Q_G(s, g1)$                               |

### 130 **Experimental Task**

131 The experiment included a training phase of 10 miniblocks, followed by the main experiment  
132 comprising 60 miniblocks. The 60 miniblocks in the main experiment were subdivided into three  
133 sessions of 20 miniblocks between which participants could make a self-determined pause. A  
134 miniblock consisted of  $T = 15$  trials in which participants had to accept or reject presented offers to  
135 collect A-points ( $Pts_t^A$ ) and B-points ( $Pts_t^B$ , see Table 1 for a glossary of abbreviations). If  
136 participants reached the threshold of 10 points for either A- or B-point scale after 15 trials, they  
137 received a reward of 5 cents. If participants reached the threshold for both point scales, they received  
138 a reward of 10 cents. If none of the two thresholds was reached, no additional reward was provided.  
139 In total, each participant completed 150 training trials and 900 trials in the main experiment.

140 Each trial started with a response phase lasting until a response was made, but not more than 3 s (Fig  
141 1, A). The current amount of A-points and B-points was visualized by two vertical bars flanking the  
142 stimulus display. Horizontal white lines marked the threshold of 10 points. At the top of the screen, a  
143 grey timeline informed the participants about the remaining trials in the miniblock. The current offer  
144 was displayed at the bottom centre, and the two choice options were presented in the centre of the  
145 screen by the framed words ‘accept’ and ‘wait’. Participants could accept an offer by an upwards  
146 keypress and reject the offer by a downwards keypress. If participants did not respond within 3 s the  
147 trial was aborted, and a message was displayed reminding the participant to pay attention. If  
148 participants missed the response deadline more than 5 times in the whole main experiment, 50 cents  
149 were subtracted from their final payoff (mean number of timeouts = 1.34, SD = 1.7). After the  
150 response phase, feedback was displayed for 1.5 s. Response feedback included a change in colour of  
151 the frame around the selected response from white to green. Additionally, the gain or loss of points  
152 was visualized by colouring the respective area on the bar either green or red. After 15 trials,  
153 feedback for the miniblock was displayed for 4 s informing the participants whether they won 5, 10  
154 or 0 cents. Code for experimental control and stimulus presentation was custom written in Matlab  
155 (MathWorks) with extensions from the Psychophysics toolbox [18].

156 Participants were presented with four different offers (A, B, Ab, and aB) that occurred with equal  
157 probability on each trial of the miniblock (see Fig 1, B). We call A or B basic offers and Ab or aB  
158 mixed offers. Accepting basic offers increased the corresponding point count, whereas accepting  
159 mixed offers transferred a single point from one scale to the other. The basic offers introduce a  
160 stochastic base rate of points, which allows participants to accumulate enough points on one or both  
161 point scales. In contrast, mixed offers allow us to identify participants’ intention to reach a state in  
162 which either both point scales are above threshold ( $Pts_T^A \geq 10$  and  $Pts_T^B \geq 10$ ) or only one point  
163 scale is above threshold (e.g.  $Pts_T^A < 10$  and  $Pts_T^B \geq 10$ ; see below for more details). Rejecting an  
164 offer did not have any effect on the current point count. All participants received the same sequence  
165 of offers. We generated pseudorandomized lists for the training phase and for the three main  
166 experimental phases such that the frequency of offers reflected an equal offer occurrence probability  
167 in every list. We associated each offer with a coloured symbol to facilitate fast recognition.

168 Three different conditions modulated the difficulty to reach both thresholds by varying the number of  
169 initial points (Fig 1, C). We chose the number of initial points such that an optimal agent’s  
170 probability of reaching both thresholds was 75% in easy, 35% in medium and 7% in hard. The  
171 agent’s goal reaching performance for each initial point configuration was based on 10,000 simulated  
172 miniblocks with uniform offer probability (see below how we define the optimal agent). The same  
173 sequence of start conditions was presented to all participants. Pseudorandomized lists with a balanced  
174 frequency of initial point configurations were generated for the training phase and for the three main  
175 experimental phases. Note that the observed agent behaviour in the results section deviates from what  
176 we expected based on the experimental parametrization process. These discrepancies arise because  
177 we used random offer sequences (offers with equal probability) for experimental parametrization, but  
178 one specific offer sequence for the actual experiment. For example, in some miniblocks there were  
179 only few basic offers (see S1-4 Fig for details about the used offer sequence).

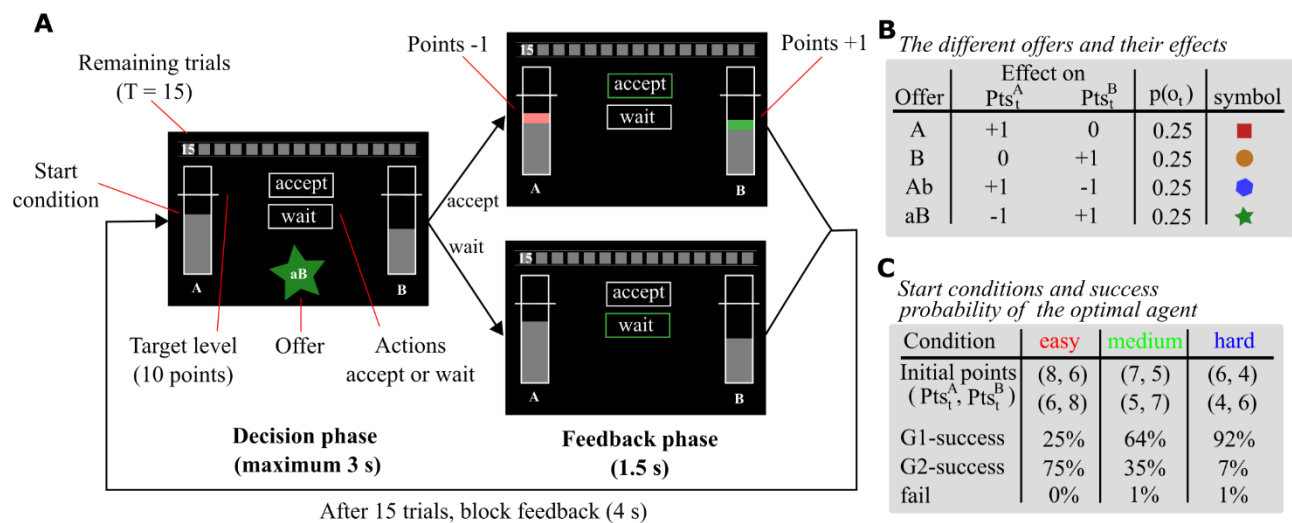

180

181 **Fig 1. Experimental task.** (A) Depiction of trial timeline and stimulus features. Participants  
 182 performed miniblocks of 15 trials in which they collected points to reach either one or two goals,  
 183 rewarding them with additional 5 or 10 Cents. Each trial started with a decision phase (maximum 3s)  
 184 in which participants had to accept or reject a presented offer. Depending on the offer, accepting  
 185 increased or decreased A- and B-points. The current amount of points was displayed by two grey  
 186 bars flanking the stimulus screen. In the feedback phase (1.5s), gained points were displayed as a  
 187 green area and lost points as a red area on the bar. The horizontal lines crossing the bars indicated the  
 188 threshold for reaching goal A and goal B. After 15 trials, feedback for the miniblock was displayed  
 189 (4s) informing the participant about the reward gained. (B) Summary of offer types and their effect  
 190 on point count. Offers occurred with equal probability in each trial of the miniblock. Basic offers (A  
 191 and B) increased either A or B points. Mixed offers (Ab and aB) added one point on one side but  
 192 subtracted one point on the other side. Only accepting an offer had an effect on points. (C) Three  
 193 different conditions modulated the difficulty to reach both thresholds by varying the number of initial  
 194 points. Using an optimal agent, we chose the number of initial points, such that the agent's  
 195 probability of reaching both thresholds (G2-success) was 75% in easy, 35% in medium and 7% in  
 196 hard.

## 197 Choice classification

198 In order to maximize reward, it was key for the participants to decide whether they should pursue the  
 199 A- and B-goal in a sequential or in a parallel manner. A parallel strategy, i.e. balancing the two point  
 200 scales, increases the likelihood that both goals (G2, see Table 1) will be reached at the end of the  
 201 miniblock, but at the risk of failing. A sequential strategy, i.e. first secure one goal, then focus on the  
 202 second one, might increase the likelihood to reach at least one goal (G1) within 15 trials, but  
 203 decreases the likelihood to achieve G2.

204 To obtain a trial-wise measure of the pursued goal strategy, choices were classified based on the  
 205 current point difference and the offer. Choices that minimized the difference between points were  
 206 classified as two-goal-choice ( $a_t = g2$ ), reflecting the intention to fill both bars using a parallel  
 207 strategy. Choices that maximized the difference between points were classified as one-goal-choice  
 208 ( $a_t = g1$ ), reflecting the intention to pursue G1, or the intention to maintain one bar above threshold  
 209 if G1-success has already been attained (see S1 Table). For example, if a participant has 8 A-points  
 210 and 6 B-points and the current offer is Ab, accepting would be a g1-choice, whereas waiting would



211 be a g2-choice. Conversely, for an aB offer, accepting would be a g2-choice and waiting a g1-choice.  
 212 If the difference between points ( $Pts_t^A - Pts_t^B$ ) is 1 and the offer is aB, g-choice is not defined  
 213 because the absolute point difference would not be changed. This also applies to the mirrored case,  
 214 where the difference between points ( $Pts_t^A - Pts_t^B$ ) is -1 and the offer is Ab. Note that, due to the  
 215 experimental design, response (accept/wait) and g-choice (g2/g1) were weakly correlated ( $r = 0.21$ ).  
 216 Furthermore, g-choice classification is only defined for the mixed offers (Ab and aB). The basic  
 217 offers (A and B) are not informative with respect to the participants' pursued goal strategy.  
 218 Importantly, all trial-level analysis will be restricted to trials which can be related to g-choices.

## 219 Task model

220 Here we will formulate the task in an explicit mathematical form, which will help us clarify what  
 221 implicit assumptions we make in the behavioural model [19]. We define a miniblock of the two-goal  
 222 task as a tuple

$$(T, S, O, R, A, p(s_{t+1}|s_t, o_t, a_t), p(o_t), p(r_t|s_t)) \quad (1)$$

223 where

- 224 •  $T = 15$  denotes the number of trials in a miniblock, hence  $t = 1, \dots, 15$ .
- 225 •  $S = \{0, \dots, 20\}^2$  denotes the set of task states, corresponding to the point scale of the two  
 226 point types (A, and B). Hence, a state  $s_t$  in trial  $t$  is defined as a tuple consisting of point  
 227 counts along the two scales,  $s_t = (Pts_t^A, Pts_t^B)$ .
- 228 •  $O = \{A, B, Ab, Ba\}$  denotes the set of four offer types, where the upper case letters denote an  
 229 increase in points of a specific type and the lower case letters subtraction of points.
- 230 •  $R = \{R_0, R_L, R_H\} = (0, 5, 10)$  denotes the set of rewards.
- 231 •  $A = \{0, 1\}$  denotes the set of choices, where 0 corresponds to rejecting an offer and 1 to  
 232 accepting an offer.
- 233 •  $p(s_{t+1}|s_t, o_t, a_t)$  denotes state transitions which are implemented in a deterministic manner  
 234 as  $s_{t+1} = s_t + a_t * m(o_t)$ , where  $m(o_t)$  maps offer types into the point changes on the two  
 235 point scales.
- 236 •  $p(o_t = i) = \frac{1}{4}$  (for  $\forall i \in O$ ) denotes a uniform distribution from which the offers are  
 237 sampled.
- 238 •  $p(r_t|s_t)$  denotes the state and trial dependent reward distribution defined as

$$\begin{aligned} p(r_t = R_0|s_t) &= 1, \text{ for } \forall t < T \\ p(r_T = R_L|Pts_T^A \geq 10 \oplus Pts_T^B \geq 10) &= 1 \\ p(r_T = R_H|Pts_T^A \geq 10 \wedge Pts_T^B \geq 10) &= 1 \end{aligned}$$

239 Note that in the experiment the participants are exposed to a pseudo-random sequence of offers,  
 240 meaning that within one experimental block all participants observed the same sequence of offers  
 241 pre-sampled from this uniform distribution (see S1-4 Fig. for additional information about the used  
 242 offer sequence). For simulations and parameter estimates we use the same pseudo-random sequence  
 243 of observations, hence in each trial  $t$  of a specific block  $b$  offers are selected from a predefined  
 244 sequence  $o_{1:T}^{1:B} = (o_1^1, \dots, o_T^1, \dots, o_1^B, \dots, o_T^B)$ , initially generated from a uniform distribution.

## 245 Behavioural model

246 To build a behavioural model, we assume that participants have learned the task representation  
 247 through the training session and initial instruction. Hence, the behavioural model is represented by  
 248 the following tuple

$$(T, S, O, R_\kappa, A, p(s_{t+1}|s_t, o_t, a_t), p(o_t), p(r_t|s_t)) \quad (2)$$

249 where

- 250 •  $T, S, O, A, p(s_{t+1}|s_t, o_t, a_t), p(o_t), p(r_t|s_t)$  are defined the same way as in the task model.
- 251 •  $R_\kappa = \{0, 5, 10 \cdot \kappa\}$  denotes an agent-specific valuation of the rewarding states. Although the  
 252 instructions for the experimental task clearly explained that participants receive a specific  
 253 monetary reward depending on the final state reached during a miniblock, we considered a  
 254 potential biased estimate of the ratio between G2 and G1 monetary rewards, quantified with  
 255 the free model parameter  $\kappa \in [0, 2]$ . In other words, we assumed that the participants might  
 256 overestimate or underestimate the value of a G2-success, relative to a G1-success.

257 Importantly, the process of action selection corresponds to following a behavioural policy that  
 258 maximises expected value during a single miniblock. We classified as G2-success miniblocks in  
 259 which both point scales were above threshold after the final trial ( $Pts_T^A \geq 10$  and  $Pts_T^B \geq 10$ ). We  
 260 classified as G1-success miniblocks in which only one point scale was above threshold (e.g.  $Pts_T^A <$   
 261  $10$  or  $Pts_T^B \geq 10$ ).

262 In what follows we derive the process of estimating choice values and subsequent choices based on  
 263 dynamic programming applied to a finite horizon Markov decision process ([20]; for experimental  
 264 studies see also [9, 21]).

### 265 **Forward Planning**

266 We start with a typical assumption used in reinforcement learning, namely that participants choose  
 267 actions with the goal to maximize future reward. Starting from some state  $s_t$  at trial  $t$ , offer  $o_t$ , and  
 268 following a behavioural policy  $\pi$  we define an expected future reward as

$$V[s_t, o_t|\pi] = \sum_{k=t+1}^T \gamma^{k-t-1} E[r_k|s_t, o_t, \pi] \quad (3)$$

269 where  $\gamma$  denotes a discount rate and  $E[r_k|s_t, o_t, \pi]$  denotes expected reward at some future time step  
 270  $k$ . The behavioural policy sets the state-action probability  $\pi(a_t, \dots, a_T|s_t, \dots, s_{T-1})$  over the current  
 271 and future trials. Hence, we can obtain the expected reward as

$$E[r_k|s_t, \pi] = \sum_{r_k} r_k p(r_k|s_t, \pi) \quad (4)$$

272 where



$$p(r_k|s_t, \pi) = \sum_{s_{t+1:k}} \sum_{a_{t:k-1}} p(r_k|s_k) \prod_{\tau=t+1}^k p(s_\tau|s_{\tau-1}, o_{\tau-1}, a_{\tau-1}) p(o_{\tau-1}) \pi(a_{\tau-1}|s_{\tau-1}) \quad (5)$$

273 Note that we use  $s_{t+1:k}$ , and  $a_{t:k-1}$  to denote a tuple of sequential variables, hence  $x_{m:n} =$   
 274  $(x_m, \dots, x_n)$ . The key step in deriving the behavioural model was to find the policy which maximises  
 275 the expected future reward, that is, the expected state-offer value. In practice, one obtains the optimal  
 276 policy as

$$\pi^* = \underset{\pi}{\operatorname{argmax}} V[s_t, o_t | \pi] \quad (6)$$

277 We solve the above optimization problem using the backward induction method of dynamic  
 278 programming. The backward induction algorithm is defined in the following iterative steps:

- 279 (i) set the value of final state  $s_T$  as the reward obtained in that state  $V[s_T | \pi^*] =$   
 280  $\sum_{r_T \in R_\kappa} r_T p(r_T | s_T)$
- 281 (ii) compute state-offer-action value as  $Q(s_k, o_k, a_k) = \gamma \sum_{s_{k+1}} V[s_{k+1} | \pi^*] p(s_{k+1} | s_k, o_k, a_k)$
- 282 (iii) set optimal choice for given state-offer pair as  $a_k^* = \operatorname{argmax}_a Q(s_k, o_k, a)$
- 283 (iv) define the expected value of state  $s_k$  under optimal policy  $\pi^*$  as  
 284  $V[s_k | \pi^*] = \sum_{o_k} Q(s_k, o_k, a_k^*) p(o_k)$
- 285 (v) repeat steps (ii) – (iv) until  $k = t$

286 Hence, for a fixed value of the reward ratio ( $\kappa$ ) an optimal choice at trial  $t$  corresponds to

$$a_t^* = \underset{a}{\operatorname{argmax}} Q(s_t, o_t, a) \quad (7)$$

287 We will define the optimal agent as an agent who has a correct representation of the reward ratio  
 288 ( $\kappa = 1$ ) and does not discount future reward ( $\gamma = 1$ ). We illustrate in Fig 2 the Q-value to accept,  
 289 estimated for the case of the optimal agent in an example trial ( $Pts_t^A = 8$ ,  $Pts_t^B = 11$ ,  $o_t = Ab$ ).

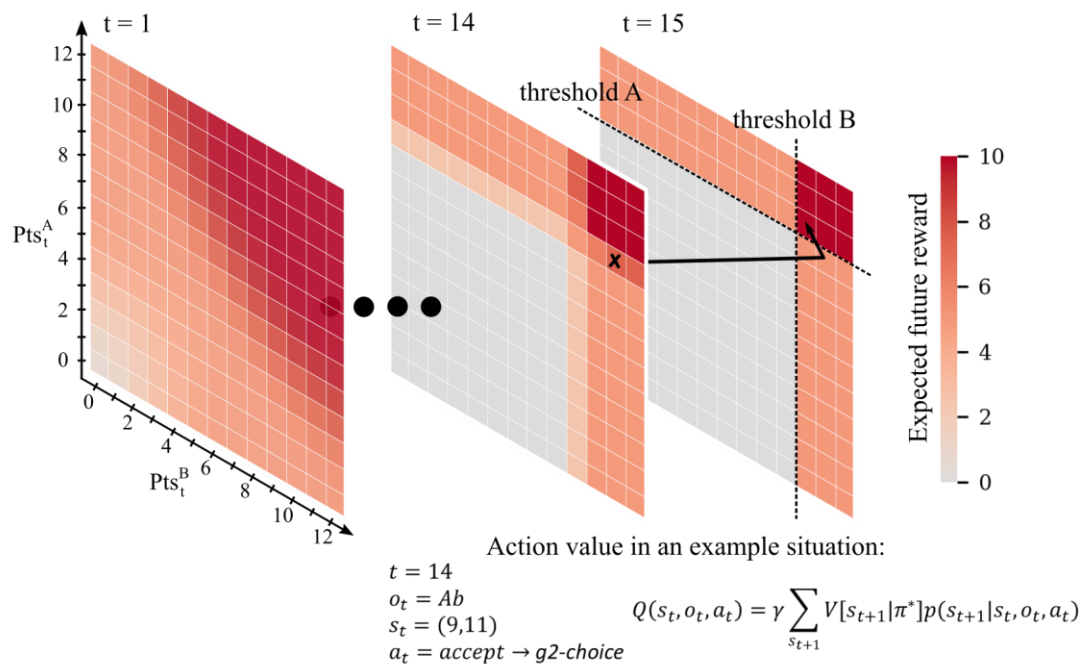

290

291 **Fig 2. Illustration of the state space and associated expected future reward for the optimal**  
 292 **agent ( $\gamma = 1$ ,  $\kappa = 1$ ).** The black arrow shows a hypothetical transition in the state space. In trial 14  
 293 the participant has 9 A-points and 11 B-points (marked by the black cross) and accepts an offer Ab,  
 294 gaining one A-point and losing one B-point (g2-choice). In the resulting state, both thresholds are  
 295 reached; thus, the value of that state is 10 Cents. Similarly, the action that leads to that state has an  
 296 associated Q-value of 10 Cents. In this example the agent would just have to wait in the last trial (15)  
 297 to gain a 10 cents reward.

## 298 Response likelihood

299 Participants might compute expected values by mentally simulating and comparing sequences of  
 300 actions towards the end of the miniblock. To illustrate the benefits of planning we consider the  
 301 following example: There are 3 trials left in the current miniblock, and the participant has 9 A-points  
 302 and 9 B-points (10 is threshold), and she receives offer Ab. Planning would, for example, allow to  
 303 compute the probabilities for G2 when choosing either wait or accept. By waiting the participant  
 304 would enter the second last trial with 9 A-points and 9 B-points. Receiving offer A or B in the  
 305 second last trial (0.5 probability) followed by the complementary offer A or B in the last trial (0.25  
 306 probability) would grant G2. When choosing accept, the participant will have in the second last trial  
 307 10 A-points and 8 B-points. Consequently, she would need two consecutive B-offers (0.25 \* 0.25  
 308 probability) to achieve G2. Hence, by planning ahead one would conclude that wait gives the highest  
 309 probability for a G2-success.

310 Still, planning an arbitrary number of future steps is complex and unrealistic. Hence, we make an  
 311 assumption that the process of optimal action selection described above is perturbed by noise  
 312 (planning noise, and response noise) which we quantify in the form of a parameter  $\beta$ , denoting  
 313 response precision. Hence, this precision parameter is critical to characterize the participants'  
 314 reliance on forward planning. Since the difference in expected future rewards of a g1- or g2- choice  
 315 is high when the goal is close (S5 Fig),  $\beta$  is able to selectively capture g-choice performance at the  
 316 end of the miniblock. Furthermore, instead of an elaborate planning process participants might use a  
 317 simpler heuristic when deciding which action to select. We capture this heuristic in form of an

318 additional offer-state-action function  $h(o_t, s_t, a_t, \theta)$  which evaluates choices relative to possible  
 319 goals. We describe this heuristic evaluation below. Overall, we can express the response likelihood  
 320 (the probability that a participant makes choice  $a_t$ ) as

$$p(a_t | \beta, \theta, \gamma, \kappa) = s(\beta Q(o_t, s_t, a_t, \gamma, \kappa) + h(o_t, s_t, a_t, \theta)) \quad (8)$$

321 where  $s(x)$  denotes the softmax function.

### 322 **Choice heuristic**

323 The choice heuristic is defined relative to the current offer  $o_t$ , current state  $s_t$ , and possible choices  
 324  $a_t$ . Importantly, we will interpret the choice heuristic in terms of participants' biases towards  
 325 approaching both goals in a sequential or parallel manner. Hence, it is more intuitive to define the  
 326 choice heuristic as choice biases relative to the goals, and not accept-reject choices. The choice  
 327 heuristic is defined as follows

$$h(o_t, s_t, a_t, \theta) = \begin{cases} \infty, & \text{for } o_t \in \{A, B\}, \text{ and } a_t = 1 \\ \theta, & \text{for } o_t \in \{Ab, Ba\}, \text{ and } a_t \equiv g2 \\ 0, & \text{otherwise} \end{cases} \quad (9)$$

328 where  $a_t \equiv g2$  denotes choices (accept or reject) which can be classified as g2-choices (see  
 329 subsection Choice classification for details). In summary, a choice which reduces the point difference  
 330 ( $Pts_t^A - Pts_t^B$ ), for the given offer and the current state, is classified as g2-choice and choice which  
 331 increases the point difference as g1-choice. Essentially, the strategy preference parameter  $\theta$  reflects  
 332 participants' preference for pursuing a sequential (negative values) or parallel (positive values)  
 333 strategy. For example, some participants might have a general tendency to pursue goals in a parallel  
 334 manner, independent of the actual  $Q$ -values. Conversely, participants may prefer a more cautious  
 335 sequential approach. Note that we expected this parameter to make the most significant contribution  
 336 to participants' deviation from optimal behaviour, reflecting their reliance on decision heuristics early  
 337 in the miniblock.

338 Finally, for those choices which can be classified as g2- or g1-choices, we can express the response  
 339 likelihood in a simplified form, in terms of free model parameters  $\beta, \theta, \gamma, \kappa$  (Table 2). We refer to the  
 340 difference between  $Q$ -values for g-choice as the differential expected value ( $DEV$ ),

$$DEV = Q_G(a_t = g2) - Q_G(a_t = g1) \quad (10)$$

341 Using  $DEV$ , we defined the probability of making a g2-choice as

$$p(g2) = \sigma(\beta \cdot DEV(\gamma, \kappa) + \theta) \quad (11)$$

342 where  $\sigma(x) = \frac{1}{1+e^{-x}}$  denotes the logistic function. Note that the probability of g1-choice becomes  
 343  $p(g1) = 1 - p(g2)$ .

344 Table 2. Summary of four free model parameters, the variables, the transformations used to map  
 345 values to unconstrained space and their function in modelling participant behaviour.

| Name                | Variable | Transform                             | Function                                                                                                                                                                |
|---------------------|----------|---------------------------------------|-------------------------------------------------------------------------------------------------------------------------------------------------------------------------|
| Precision           | $\beta$  | $x_1 = \ln \beta$                     | Captures the impact of <i>DEV</i> , derived by forward planning, on action selection                                                                                    |
| Strategy preference | $\theta$ | $x_2 = \theta$                        | Heuristic preference of pursuing a parallel ( $\theta > 0$ ) or sequential ( $\theta < 0$ ) strategy, independent of the actual <i>DEV</i>                              |
| Discount rate       | $\gamma$ | $x_3 = \ln \frac{\gamma}{1 - \gamma}$ | Temporal discounting of <i>DEV</i> by the factor $\gamma^{T-t}$ , where $T - t$ is the number of remaining trials                                                       |
| Reward ratio        | $\kappa$ | $x_4 = \ln \frac{\kappa}{2 - \kappa}$ | Accounts for the possibility that participants may overweight ( $\kappa > 1$ ) or underweight ( $\kappa < 1$ ) the actual reward for G2-success relative to G1-success. |

346

### 347 **Optimal agent comparison and general data analysis**

348 We compared participant behaviour with simulated behaviour of an optimal agent. To summarize, we  
 349 denote the optimal agent as the agent which has a correct representation of the reward function  
 350 ( $\kappa = 1$ ), does not discount future rewards ( $\gamma = 1$ ), is not biased in favour of any choice ( $\theta = 0$ ),  
 351 and who generates deterministic g-choices based on *DEV*-values (corresponding to  $\beta \rightarrow \infty$  in the  
 352 response likelihood, that is, the argmax operator). The optimal agent deterministically accepts A and  
 353 B offers.

354 When simulating agent behaviour to evaluate successful goal reaching, the agent received the same  
 355 sequence of offers and initial conditions as the participants. Analysis on the level of g-choices was  
 356 performed by registering instances in which the g-choice of a participant differed from the g-choice  
 357 the optimal agent would have made in the same context ( $Pts_t^A, Pts_t^B, o_t, t$ ). Trials with A or B offers  
 358 and trials in which G2 had already been reached, were excluded from the g-choice analysis.

359 The goal of this comparison between summary measures of both optimal agent and participants was  
 360 two-fold: First, we used this comparison to visualize deviations from optimality and motivate the  
 361 model-based analysis which was used to test the hypothesis that a shift from heuristics to forward  
 362 planning may explain these deviations. Second, plotting suboptimal g-choices instead of g-choices  
 363 (Fig. 4) makes behaviour between participants more comparable. Plotting the proportion of g-choices  
 364 averaged across participants would have been mostly uninformative because the significance of a g-  
 365 choice depends on the current state, which is a consequence of the individual history of past choices  
 366 within a miniblock. By registering deviations from an optimal reference point, we circumvent this  
 367 state dependence of g-choices.

368 We used a sign test as implemented in the “sign\_test” function of python’s “Statsmodels”[22]  
 369 package to test whether participants total reward and success rates differed significantly from the  
 370 optimal agent’s deterministic performance. We reported the p-value and the m-value  $m = (N(+) -$   
 371  $N(-))/2$ , where  $N(+)$  is the number of values above 0 and  $N(-)$  is the number of values below  
 372 and. To test for learning effects (in the main experimental phase), we used mixed effects models as

373 implemented in R [23] with the “lm4” package [24]. Intercepts and slopes were allowed to vary  
 374 between participants. p-values were obtained using the “lmerTest” package [25].

### 375 Hierarchical Bayesian data analysis

376 To estimate the free model parameters (Table 2) that best match the behaviour of each participant, we  
 377 applied an approximate probabilistic inference scheme over a hierarchical parametric model, so-  
 378 called stochastic variational inference (SVI) [26].

379 As a first step, we define a generic (weakly informative) hierarchical prior over unconstrained space  
 380 of model parameters. In Table 2 we summarize the roles of free model parameters of our behavioural  
 381 model and the corresponding transforms that we used to map parameters into an unconstrained space.  
 382 We use  $\mathbf{x}^n$  to denote a vector of free and unconstrained model parameters corresponding to the  $n$ th  
 383 participant. Similarly,  $\boldsymbol{\mu}$  and  $\boldsymbol{\sigma}$  will denote hyperpriors over group mean and variance for each free  
 384 model parameter. We can express the hierarchical prior in the following form

$$\mu_i \sim N(m_i, s_i) \quad (12)$$

$$\sigma_i \sim C^+(0, 1) \quad (13)$$

$$x_i^n \sim N(\mu_i, \lambda \sigma_i) \quad (14)$$

$$\text{for } i \in [1, \dots, d], \text{ and } n \in [1, \dots, N] \quad (15)$$

385 where  $C^+(0,1)$  denotes a Half-Cauchy prior with scale  $s = 1$ ,  $d$  number of parameters, and  $N$   
 386 number of participants. Note that by using this form of a hierarchical prior we make an explicit  
 387 assumption that parameters defining the behaviour of each participant are centred on the same mean  
 388 and share the same prior uncertainty. Hence, both the prior mean and uncertainty for each parameter  
 389 are defined at the group level. Furthermore, the hyper-parameters of the prior  
 390  $\boldsymbol{\eta} = (m_1, \dots, m_d, s_1, \dots, s_d, \lambda)$  are also estimated from the data (Empirical Bayes procedure) in parallel  
 391 to the posterior estimates of latent variables  $\boldsymbol{\theta} = (\mu_1, \dots, \mu_d, \sigma_1, \dots, \sigma_d, \mathbf{x}^1, \dots, \mathbf{x}^N)$ . For more details,  
 392 see supporting information (S1 Notebook).

393 The behavioural model introduced above defines the response likelihood, that is, the probability of  
 394 observing measured responses when sampling responses from the model, condition on the set of  
 395 model parameters  $(\mathbf{x}^1, \dots, \mathbf{x}^N)$ . The response likelihood can be simply expressed as a product of  
 396 response probabilities over all measured responses  $A = (\mathbf{a}^1, \dots, \mathbf{a}^N)$ , presented offers  $O =$   
 397  $(\mathbf{o}^1, \dots, \mathbf{o}^N)$ , and states (point configurations) visited by each participant  $S = (\mathbf{s}^1, \dots, \mathbf{s}^N)$  over the  
 398 whole experiment

$$p(A|O, S, \mathbf{x}^1, \dots, \mathbf{x}^N) = \prod_{n=1}^N \prod_{b=1}^M \prod_{t=1}^T p(a_{b,t}^n | s_{b,t}^n, o_{b,t}^n, \mathbf{x}^n) \quad (16)$$

399 where  $b$  denotes experimental block, and  $t$  a specific trial within the block.

400 To estimate the posterior distribution (per participant) over free model parameters, we applied the  
 401 following approximation to the true posterior

$$p(\mathbf{x}^1, \dots, \mathbf{x}^N, \boldsymbol{\mu}, \boldsymbol{\sigma} | A, S, O) \approx Q(\boldsymbol{\mu}, \boldsymbol{\sigma}) \prod_n^N Q(\mathbf{x}^n) \quad (17)$$

$$Q(\boldsymbol{\mu}, \boldsymbol{\sigma}) = \frac{1}{\sigma_1 \dots \sigma_d} \mathcal{N}_{2d}(\mathbf{z}; \boldsymbol{\mu}_g, \boldsymbol{\Sigma}_g) \text{ for } \mathbf{z} = (\mu_1, \dots, \mu_d, \ln \sigma_1, \dots, \ln \sigma_d) \quad (18)$$

$$Q(\mathbf{x}^n) = \mathcal{N}_d(\mathbf{x}^n; \boldsymbol{\mu}_x^n, \boldsymbol{\Sigma}_x^n) \quad (19)$$

402 Note that the approximate posterior captures posterior dependencies between free model parameters  
 403 (in the true posterior) on both levels of the hierarchy using the multivariate normal and multivariate  
 404 log-normal distributions. However, for practical reasons, we assume statistical independence between  
 405 different levels of the hierarchy, and between participants. Independence between participants is  
 406 justified by the structure of both response likelihood (responses are modelled as independent and  
 407 identically distributed samples from conditional likelihood) and hierarchical prior (a priori statistical  
 408 independence between model parameters for each participant).

409 Finally, to find the best approximation of the true posterior given the functional constraints of our  
 410 approximate posterior, we minimized the variational free energy  $F[Q]$  with respect to the parameters  
 411 of the approximate posterior.

$$-\ln p(A|S, O) = F[Q] - D_{KL}(Q||p) \leq F[Q] = f(\boldsymbol{\mu}_g, \boldsymbol{\Sigma}_g, \boldsymbol{\mu}_x^1, \boldsymbol{\Sigma}_x^1, \dots, \boldsymbol{\mu}_x^N, \boldsymbol{\Sigma}_x^N) \quad (20)$$

$$F[Q] = \int d\mathbf{x}^1 \dots d\mathbf{x}^N d\boldsymbol{\mu} d\boldsymbol{\sigma} Q(\boldsymbol{\mu}, \boldsymbol{\sigma}) \prod_n^N Q(\mathbf{x}^n) \ln \frac{Q(\boldsymbol{\mu}, \boldsymbol{\sigma}) \prod_n^N Q(\mathbf{x}^n)}{p(A|O, S, \mathbf{x}^1, \dots, \mathbf{x}^N) p(\mathbf{x}^1, \dots, \mathbf{x}^N, \boldsymbol{\mu}, \boldsymbol{\sigma})} \quad (21)$$

412 The optimization of the variational free energy  $F[Q]$  is based on the SVI implemented in the  
 413 probabilistic programming language Pyro [27] and the automatic differentiation module of PyTorch  
 414 [28], an open source deep learning platform.

415 As a final remark, we would like to point out that it is possible to use a different hierarchical prior  
 416 [29], different parametrization of the hierarchical model [30] or different factorization of the  
 417 approximate posterior (e.g., mean-field approximation). However, through extensive comparison of  
 418 posterior estimates on simulated data, we have determined that the presented hierarchical model and  
 419 the corresponding approximate posterior provide the best posterior estimate of free model parameters  
 420 among the set of parametric models we tested (S1 Notebook).

## 421 Results

422 To investigate how the balance between computationally costly forward planning and heuristic  
 423 preferences changes as a function of temporal distance from the goals, participants performed  
 424 sequences of actions in a novel sequential decision-making task. The task employed a two-goal  
 425 setting, where participants had to decide between approaching the two goals in a sequential or in a  
 426 parallel manner. We first performed a standard behavioural analysis, followed by a model-based



427 approach showing that participants use a mixture of strategy preference and forward planning to  
428 select their action.

### 429 **Standard behavioural analysis**

430 We first analysed the general performance of all participants and – for each miniblock and trial –  
431 compared it to the behaviour of an optimal agent possessing perfect knowledge of the task and  
432 performing full forward planning to derive an optimal policy that maximizes total reward. The  
433 motivation of this comparison was to detect differences between how the optimal agent and  
434 participants perform the task. These differences will motivate our model-based analysis below. To  
435 compute and compare optimal vs individual policies, all participants and the agent received exactly  
436 the same sequence of offers and start conditions. The difference in total reward between participants  
437 and agent was significant ( $m = -35.5$ ,  $p < 0.001$ ), where participants earned 388.5 Cents ( $SD = 13.6$ )  
438 and the agent earned 405 Cents. As expected, both participants and agent earned more money in the  
439 easy condition than in the medium condition and least in the hard condition (Fig 3, A, C). In the easy  
440 and medium condition, the agent earned significantly more than the participants (easy:  $M = 8.7$   
441 Cents,  $SD = 8.4$ ,  $m = -33$ ,  $p < 0.001$ ; medium:  $M = 7.2$  Cents,  $SD = 7.0$ ,  $m = -30$ ,  $p < 0.001$ ). In the  
442 hard condition, the total reward did not differ significantly between the participants and agent,  $m =$   
443  $0.5$ ,  $p > 0.99$  (Fig 3, E). These results show that participant performance was generally close to the  
444 optimal agent but differed significantly in the easy and medium condition.

445 Next, we analysed participants' goal reaching success and compared it to the optimal agent. There  
446 were three possible outcomes in a miniblock: Achieving G1 (goal A or B), achieving G2 (A & B) or  
447 fail (neither A nor B). The main experiment comprised 20 miniblocks of each difficulty level  
448 modulating difficulty to reach G2. As expected, participants reached on average G2 more often in the  
449 easy ( $M = 71\%$ ,  $SD = 8\%$ ) than in the medium condition ( $M = 25\%$ ,  $SD = 6\%$ ),  $m = 44.5$ ,  $p < 0.001$ .  
450 In the hard condition, participants reached G2 in only 1% ( $SD = 2\%$ ) of the miniblocks. Participants  
451 failed to reach any goal in 2% ( $SD = 3\%$ ) of the miniblocks in the medium and in 6% ( $SD = 5\%$ ) of  
452 the miniblocks in the hard condition. They never failed in the easy condition (Fig 3, B). The agent  
453 reached G2 in 80% in the easy, in 30% in the medium and in 0% in the hard condition (Fig 3, D).  
454 Note that G2 cannot be reached in all miniblocks. We simulated all possible choice sequences ( $n =$   
455  $2^{15}$ ) for a given miniblock and evaluated whether G2 was theoretically possible. According to  
456 these simulations, 90% G2 performance can be reached in the easy, 35% in the medium and 5% in  
457 the hard condition.

458 When comparing participants' goal reaching success with the agent, we found that, on average, there  
459 was a consistent pattern of deviations in the easy and medium conditions (Fig 3, F). In the easy  
460 condition, participants reached G2 on average 9% ( $SD = 8\%$ ) less often than the agent ( $m = -33$ ,  $p <$   
461  $0.001$ ), but reached G1 9% ( $SD = 8\%$ ) more often ( $m = 33$ ,  $p < 0.001$ ). In the medium condition,  
462 participants reached G2 on average 6% ( $SD = 6\%$ ) less often than the agent ( $m = -26$ ,  $p < 0.001$ ) but  
463 reached G1 4% ( $SD = 7\%$ ) more often ( $m = 16.5$ ,  $p < 0.001$ ). While the agent never failed,  
464 participants had a 2% ( $SD = 3\%$ ) fail rate ( $m = 11.5$ ,  $p < 0.001$ ). In the hard condition, participants  
465 reached G2 on average 0.6% ( $SD = 1.6\%$ ) more often than the agent ( $m = 5.5$ ,  $p < 0.001$ ). G1 ( $m = -$   
466  $7$ ,  $p = 0.087$ ) and fail-rate ( $m = 3.5$ ,  $p = 0.42$ ) did not differ significantly between participants and  
467 agent. In summary, these differences in successful goal reaching between participants and the agent  
468 explains the difference in accumulated total reward: Participants obtained less reward than the agent  
469 because on average they missed some of the opportunities to reach G2 in the easy and medium  
470 condition and sometimes even failed to achieve any goal in the medium and hard condition.

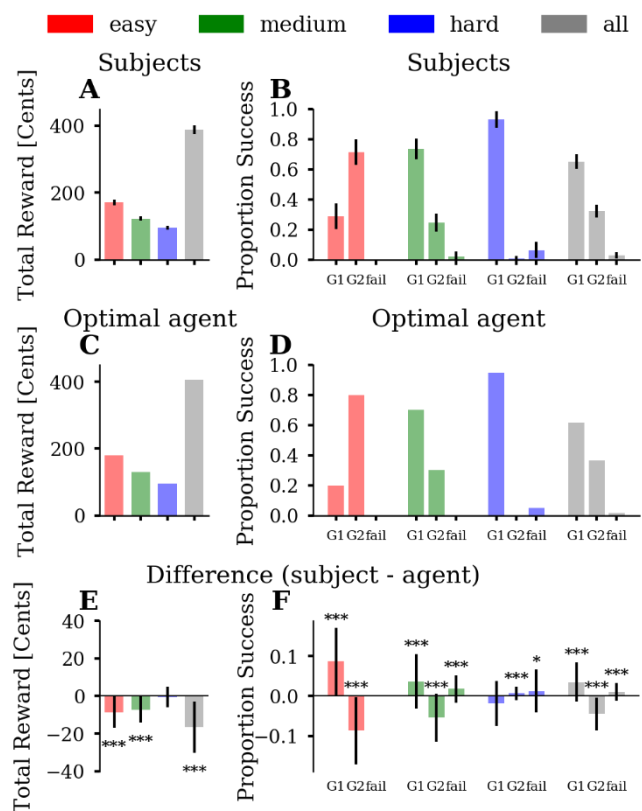

471

472 **Fig 3. Standard analyses of total reward and comparison to the optimal agent.** (A) Average total  
 473 reward across participants. The three conditions are colour-coded (easy = red, medium = green, blue  
 474 = hard) and the average over conditions is shown in grey. Error bars depict the standard deviation  
 475 (SD). (B) Proportion of successful goal-reaching averaged across participants, for each of the three  
 476 conditions. We plot the proportion of reaching, at the end of a miniblock, a single goal (G1), both  
 477 goals (G2), or no goal (fail). The fourth block of bars in grey represents the proportions averaged  
 478 over all three conditions. Error bars depict SD. (C) Simulated total reward of the optimal agent. (D)  
 479 The goal-reaching proportions of the optimal agent. (E) Average difference between participants and  
 480 agent with error bars depicting SD. (F) Averaged difference of proportion success between  
 481 participants and agent with error bars depicting SD. One can see that the average goal-reaching  
 482 proportions of participants were close to the agent's proportions. However, participants, on average,  
 483 reached G2 less often than the agent. Asterisks indicate differences significantly greater than zero  
 484 (Sign-test, \*  $\hat{=}$   $p < 0.05$ , \*\*  $\hat{=}$   $p < 0.01$ , \*\*\*  $\hat{=}$   $p < 0.001$ ).

485 How can these differences in goal-reaching success be explained? To address this, we used the  
 486 mixed-offer trials to identify which strategy a participant was pursuing in a given trial and compared  
 487 the strategy choice to what the agent would have done in this trial. We classified strategy choices as  
 488 evidence either of a parallel or a sequential strategy. With the parallel strategy (g2), participants make  
 489 choices to pursue both goals in a parallel manner, while with a sequential strategy (g1), participants  
 490 make choices to reach first a single goal and then the other. We inferred that participants used a g2-  
 491 choice for a specific mixed-offer trial when the difference between the points of the two bars was  
 492 minimized, while we inferred a g1-choice when the difference between points was maximized (see  
 493 Methods). We categorized a participant's g2-choice as suboptimal when the optimal agent would  
 494 have made a g1-choice in a specific trial and vice versa. Fig 4, A-D shows the proportions of  
 495 suboptimal g-choices in mixed-offer trials. In the easy condition, participants made barely any

496 suboptimal g2-choice (mean = 0%, SD = 0.001%), but 29% (SD = 10%) suboptimal g1-choices (Fig  
497 4, A). This means that participants, on average, preferred a sequential strategy more often than would  
498 have been optimal. In the medium condition participants made on average 6% (SD = 3%) suboptimal  
499 g2-choices and 28% (SD = 11%) suboptimal g1-choices. Similar to the easy condition, participants,  
500 on average, preferred a sequential strategy where a parallel strategy would have been optimal. In the  
501 hard condition, this pattern reversed. Participants made on average 40% (SD = 12%) suboptimal g2-  
502 choices, relative to the agent, and 11% (SD = 6%) suboptimal g1-choices. Participants' suboptimal g-  
503 choices were also reflected in goal reaching success. In the easy and medium condition, suboptimal  
504 g1-choices, relative to the agent, resulted in a higher proportion of reaching G1, and a lower  
505 proportion of reaching G2. In the hard condition, suboptimal g2-choices led to occasional fails and a  
506 tiny margin of reaching G2. However, despite suboptimal g2-choices, participants still reached G1 in  
507 93% (SD = 6%) of the miniblocks.

508 As the first test of our prediction that participants tend to use more forward planning when  
509 temporally proximal to the goal, we analysed suboptimal decisions as a function of trial time. As  
510 expected, suboptimal decisions, relative to the agent, decreased over trial time (Fig 4, B). While in  
511 the first trial, 42% (SD = 19%) of participants' g-choices deviated from the agent's g-choices,  
512 participant behaviour converged to almost optimal performance towards the end of the miniblock,  
513 with only 4% deviating g-choices (SD = 7%). We also simulated a random agent that accepts all  
514 basic A or B offers but guesses on mixed offers (S6-7 Fig). S7 Fig B shows that the random agent  
515 makes approximately 50 % suboptimal g-choices across all trials in the miniblock. That means  
516 participants used non-random response strategies, i.e. planning or heuristics, since their pattern of  
517 suboptimality across trials deviated from the straight-line pattern of the random agent.

518 In the hard condition, the number of suboptimal g2-choices similarly decreased, but not in the easy  
519 and medium condition (Fig 4, C). The number of suboptimal g1-choices decreased across trials in the  
520 easy and medium, but not in hard condition (Fig 4, D). Note that in easy and the medium conditions,  
521 opportunities to make suboptimal g2-choices are generally scarce, because the difference between  
522 action values  $DEV = Q_G(g2) - Q_G(g1)$  was mostly positive, which means that a g2-choice was  
523 mostly optimal. Similarly, in the hard condition, as there was a low number of opportunities to make  
524 suboptimal g1-choices, there was no clear decrease in the number of suboptimal g1-choices.

525 Although these findings of diminishing suboptimal choices over the course of miniblocks may be  
526 explained by the participants' initial employment of a suboptimal heuristic, there is an alternative  
527 explanation because we used an optimal agent, which uses a max operator to select its action: If this  
528 agent computes, by using forward planning, a tiny advantage in expected reward of one action over  
529 the other, the agent will always choose in a deterministic fashion the action with the slightly higher  
530 expected reward. Therefore, at the beginning of the miniblock, where the distance to the final trial is  
531 largest, the difference between goal choice values  $DEV = Q_G(g2) - Q_G(g1)$  (S5 Fig) is close to 0.  
532 The reason for this is that a single g2-choice at the beginning of the miniblock does not increase the  
533 probability for G2-success by much. However, when only few trials are left, a single g2-choice might  
534 make the difference between winning or losing G2. Since  $DEV$ s are close to 0 at the initial trials we  
535 cannot exclude the possibility yet that participants actually may have used optimal forward planning  
536 just like the agent but did not use a max operator. Instead, participants may have sampled an action  
537 according to the computed probabilities of each action to reach the greater reward in the final trial.  
538 Such a sampling procedure to select actions would also explain the observed pattern of diminishing  
539 suboptimal g-choices over the miniblock (Fig. 4 B-C). To answer the question, whether there is  
540 actually evidence that participants use heuristics, when far from the goal, even in the presence of  
541 probabilistic action selection of participants, we now turn to a model-based analysis.

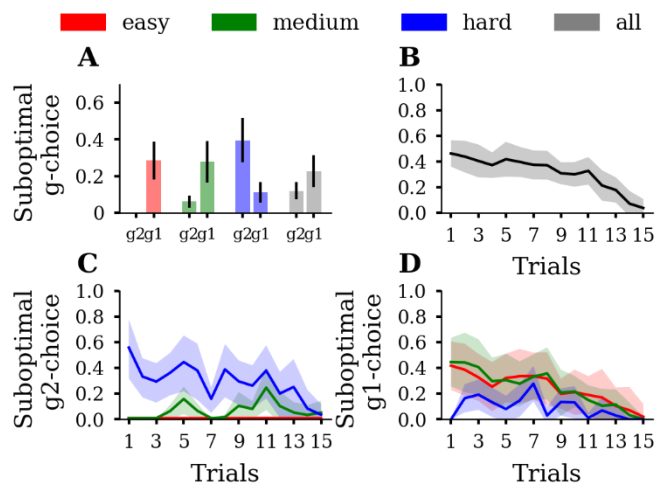

542

543 **Fig 4. (A)** Proportions of suboptimal g1-choices (g1) and suboptimal g2-choices (g2), averaged over  
544 participants. Participants tend to make suboptimal g1-choices in the easy and medium condition  
545 while this pattern reverses in the hard condition. Error bars depict SD. Conditions are colour coded.  
546 **(B)** Suboptimal g-choices as a function of trial averaged over participants. Shaded areas depict SD.  
547 **(C)** Suboptimal g2-choices as a function of trial averaged over participants. **(D)** Suboptimal g1-  
548 choices as a function of trial averaged over participants. In both C and D, one can see that  
549 participants made more suboptimal g-choices at the beginning of the miniblock than close to the final  
550 trial. Shaded areas depict SD.

### 551 **Model-based behavioural analysis**

552 To infer the contributions of participants' forward planning and heuristic preferences, we conducted a  
553 model-based analysis. If we find that participants' strategy preference  $\theta$  is smaller or larger than zero,  
554 we can conclude that participants indeed used a heuristic component to complement any forward  
555 planning. This is especially relevant for choices early in the miniblock as *DEV* values are typically  
556 close to zero. Indeed, when inferring the four parameters for all 89 participants using hierarchical  
557 Bayesian inference, we found that participants' g-choices were influenced by a heuristic strategy  
558 preference in addition to a forward planning component (Fig 5, A). For 74 out of 89 participants, we  
559 found that the 90% credibility interval (CI) of the posterior over strategy preference did not include  
560 zero. 68 of these participants had a positive strategy preference, meaning they preferred an overall  
561 strategy of pursuing both goals in parallel. Six of these participants had a negative strategy  
562 preference, meaning they preferred to pursue both goals sequentially. The median group  
563 hyperparameter of strategy preference was 0.55 (90% CI = [0.47, 0.63]). For example, a participant  
564 with this median strategy preference, in a mixed-offer trial where *DEV* = 0, would make a g2-choice  
565 with 63% probability, whereas a participant without a strategy preference bias, i.e.  $\theta = 0$ , would  
566 make a g2-choice with 50% probability. After the experiment, we had asked participants whether  
567 they used any specific strategies to solve the task and to give a verbal description of the used  
568 strategy. Reports reflected three main patterns: Pursuing one goal after the other (sequential strategy),  
569 promoting both goals in a balanced way (parallel strategy), and switching between sequential and  
570 parallel strategy, depending on context (mixed strategy). Reported strategies are in good qualitative  
571 agreement with the estimated strategy preference parameter (S8 Fig), supporting our interpretation of  
572 this parameter. Notably, the task instructions, given to the participants prior to the experiment, did  
573 not point to any specific heuristic (S1 Text). Altogether, the non-zero strategy preference in 83% of

574 participants indicates that suboptimal decisions within a miniblock (see Fig 4) are not only caused by  
575 probabilistic sampling for action selection, but also by the use of a heuristic strategy preference.

576 As expected, we found that the *DEV* (see Table 1) derived by forward planning influenced action  
577 selection (median group hyperparameter of the inferred precision  $\beta = 1.82$ , 90% CI = [1.45, 2.3], Fig  
578 5, B). For example, a hypothetical participant with parameters similar to the group hyperparameters  
579 ( $\theta = 0.55$  and  $\beta = 1.82$ ), when encountering a *DEV* = 0.5, would make a g2-choice with 82%  
580 probability. Increasing *DEV* by 1 would increase the g2-choice probability to 96%. In contrast, a  
581 participant with low precision but the same median strategy preference ( $\theta = 0.55$  and  $\beta = 0.5$ ),  
582 when encountering a *DEV* = 0.5, would make a g2-choice with 69% probability. Increasing *DEV* by  
583 1 would increase g2-choice probability to 79%. We found evidence only for weak discounting of  
584 future rewards, as for most participants the inferred discount was close to 1 (median of the inferred  
585 discount parameter  $\gamma = 0.984$ , 90% CI = [0.978, 0.988], Fig 5, C). We found that some participants  
586 used a reward ratio different from the objective value of 1 (CI not containing 1). Twelve participants  
587 had a reward ratio greater than 1 and 17 participants had a reward ratio smaller than 1. However, the  
588 median group hyperparameter of the inferred reward ratio was close to the objective value of 1 ( $\kappa =$   
589 1.05, 90% CI = [0.99, 1.11], Fig 5, D). A reward ratio of 1.2 means, that participants behaved as if  
590 the value of achieving G2 would be 2.4 times the value of achieving G1 (when in reality the reward is  
591 only double as high). While strategy preference has its greatest influence during the first few trials of  
592 a miniblock, the reward ratio has an influence only when forward planning, i.e. changes the *DEV*,  
593 and will therefore affect action selection most during the final trials of a miniblock. In addition, we  
594 found only low posterior correlation between the strategy preference and reward ratio parameter,  
595 indicating that these two parameters model distinct influences on goal reaching behaviour.

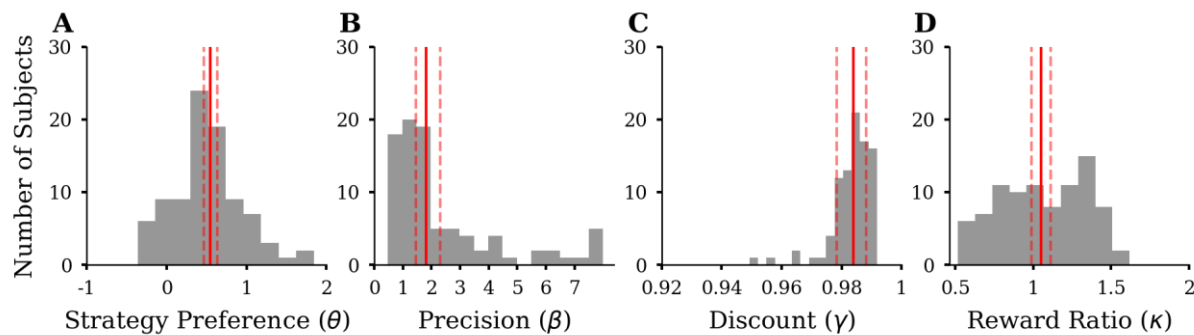

596

597 **Fig 5. Summary of inferred parameters of the four-parameter model for all 89 participants.** We  
598 show histograms of the median of the posterior distribution, for each participant. Solid red lines  
599 indicate the median of the group hyperparameter posterior estimate with dashed lines indicating 90%  
600 credibility intervals (CI). (A) Histogram of strategy preference parameter  $\theta$ . (B) Histogram of  
601 precision parameter  $\beta$  (last bin containing values  $> 8$ ). (C) Histogram of discount parameter  $\gamma$ . (D)  
602 Histogram of reward ratio parameter  $\kappa$ .

603 To show that our model with constant parameters is able to capture a dynamic shift from heuristic  
604 decision making to forward planning we conducted two sets of simulations where we systematically  
605 varied the response precision  $\beta$  and the strategy preference parameter  $\theta$ . First, we simulated  
606 behaviour where we varied  $\beta$  between 0.25 and 3 with  $\theta$ ,  $\gamma$ , and  $\kappa$  sampled from their fitted  
607 population mean (S1-2 Movie). S2 Movie, B shows that the higher  $\beta$ , the fewer suboptimal g-choices  
608 are made towards the end of the miniblock. Second, we simulated behaviour where we varied  $\theta$   
609 varied between -1 and 1 with  $\beta$ ,  $\gamma$ , and  $\kappa$  sampled from their fitted population mean (S3-4 Movie). S4



610 Movie, B shows that a change in  $\theta$  affects the number of suboptimal g-choices made at the beginning  
611 but not at the end of the miniblock. These two results support the argument that the  $\theta$  parameter is  
612 able to capture heuristic decision making at the beginning of the miniblock while the  $\beta$  parameter is  
613 able to capture planning behaviour at the end of the miniblock. The reason for this interaction  
614 between parameter effect and trial number is that differential expected value (*DEV*) computed by  
615 forward planning is close to zero at the beginning of the miniblock but increases towards the end of  
616 the miniblock (S5 Fig). For small *DEVs*, the influence of  $\beta$  on choice probability is marginal;  
617 therefore, the relative influence of the strategy preference parameter  $\theta$  is high, and behaviour is  
618 explained by using the heuristic. For higher trial numbers, i.e. closer to the end of the miniblock,  
619 *DEVs* tend to be high so that the influence of the response precision  $\beta$  is high, and the relative  
620 influence of  $\theta$  is low; therefore, towards the end of the miniblock behaviour is explained by forward  
621 planning with a shift in between, depending on the dynamics of the *DEV*. We also implemented a  
622 model with changing parameters over trials and compared it to the constant model. Parameters were  
623 fit separately for three partitions of the miniblock, i.e. early (trials 1- 5), middle (trials 6-10) and late  
624 trials (11-15). Model comparisons showed that this model with changing parameters had lower model  
625 evidence compared to the model with constant parameters (S9 Fig). We interpret these results as  
626 further evidence that the described constant parameterization is sufficient to describe a hidden shift  
627 from using a heuristics to forward planning.

628 Finally, as an additional test of the hypothesis that participants rely more on heuristic preferences  
629 when the goal is temporally distant, we conducted a multiple regression analysis (Fig 6, A). To do  
630 this, we divided the data into the first (first 7 trials) and the second half (last 8 trials) of miniblocks,  
631 and computed, for each participant the proportion of g2-choices in the mixed-offer trials. We fitted,  
632 across participants, these proportions of g2-choices against 6 regressors: strategy preference,  
633 precision, discount rate, reward ratio, a dummy variable coding for the first and second miniblock  
634 half and interaction between strategy preference and miniblock half. We found a significant  
635 interaction between strategy preference and miniblock-half ( $p < 0.001$ ), demonstrating that strategy  
636 preference is more predictive for the proportion of g2-choices in the first half of the miniblock than in  
637 the second half. Fig 6, B visualizes the interaction effect showing that the slope of the marginal  
638 regression line for the first half of the miniblock is greater than the slope of the marginal regression  
639 line for the second half of the miniblock. This finding provides additional evidence that participants  
640 rely on heuristic preferences when the goal is temporally far away but use differential expected  
641 values (*DEV*) derived by forward planning when the goal is closer.



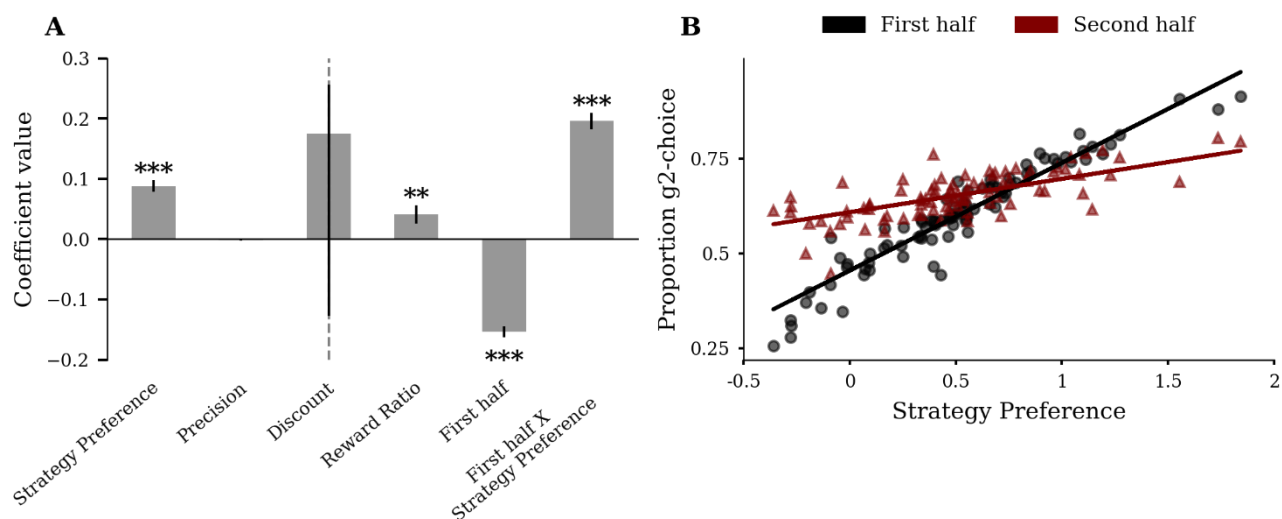

642

643 **Fig 6. Strategy preference is more predictive for participant's proportion of g2-choices in the**  
 644 **first than in the second half of the miniblock. (A)** Linear regression of proportion g2-choice  
 645 against parameters from the four-parameter model, a dummy variable coding for miniblock-half and  
 646 interaction between miniblock-half and strategy preference. The significant interaction term supports  
 647 the hypothesis that the influence of strategy preference on g2-choice proportion is greater in the first  
 648 than in the second half of the miniblock. Error bars represent SE. Asterisks indicate coefficients  
 649 significantly different from 0 (t-test, \*  $\triangleq$   $p < 0.05$ , \*\*  $\triangleq$   $p < 0.01$ , \*\*\*  $\triangleq$   $p < 0.001$ ). **(B)** Strategy  
 650 preference plotted against the proportion of g2-choices in the first half of the miniblock (black) and  
 651 in the second half of the miniblock (red). Solid lines represent marginal regression lines.

652 In addition, we conducted model comparisons, posterior predictive checks and parameter recovery  
 653 simulations to test whether our model is an accurate and parsimonious fit to the data. First, we  
 654 compared variants of our model, where we fixed individual parameters (S9 Fig). Adding  $\theta$  and  $\beta$   
 655 increased model evidence, confirming their importance in explaining participant behaviour. The  
 656 three-parameter model ( $\theta$ ,  $\beta$ ,  $\kappa$ ) had the highest model evidence among all 16 models. Adding  $\gamma$  did  
 657 not increase model evidence. This result is consistent since we found only little evidence for  
 658 discounting when fitting the parameters, see Fig. 5C. To test whether participants used condition-  
 659 specific response strategies (e.g., use heuristics in the easy and hard but plan forward in the medium  
 660 difficult condition) we estimated model parameters separately for conditions. However, the  
 661 condition-wise model had lower model evidence compared to the conjoint model, indicating that  
 662 participants use a condition-general approach to arbitrate between using a heuristic and planning  
 663 ahead. Second, we simulated data using the group mean parameters as inferred from the participants'  
 664 data and compared it to the observed data. Visual inspection shows that both the simulated  
 665 performance pattern (S10 Fig) and the simulated frequency of suboptimal g-choices (S11 Fig) closely  
 666 resemble the experimentally observed patterns (Fig. 3 and 4). Third, we simulated data using  
 667 participants' posterior mean and tested whether we could reliably infer parameters (S1 Notebook).  
 668 Results showed that the inferred  $\beta$ ,  $\theta$  and  $\kappa$  align with the true parameter value, but simulation-based  
 669 calibration [31] suggests that estimates of  $\gamma$  are biased. Taken together, our model provides a good fit  
 670 to the data, where the data are informative about the three parameters  $\beta$ ,  $\theta$  and  $\kappa$ .

671

672 We also tested whether participants showed learning effects in the main experimental phase. In a first  
 673 linear model, the depended variable was the total reward and the predictor was the experimental  
 674 block number (miniblock 1-20, miniblock 21-40, miniblock 41-60). The analysis revealed a

675 significant but small main effect of experiment block ( $\beta = 5.4$ ,  $SE = 0.5$ ,  $p < 0.001$ ). In a second  
676 logistic model the dependent variable was suboptimal goal choice (1 = suboptimal, 0 = optimal) and  
677 the predictor was experiment block. The second analysis revealed a significant but small main effect  
678 of experiment block on the probability to make a suboptimal g-choice ( $\beta = -0.084$ ,  $SE = 0.02$ ,  $p <$   
679  $0.001$ ). Furthermore, we fitted the three parameter model ( $\theta, \beta, \kappa$ ) separately for experiment blocks.  
680 Model comparisons revealed that the experiment block-wise model had lower model evidence  
681 compared to the conjoint model (S9 Fig.).

682  
683 As a final control analysis, we used logistic regression to establish how the absolute difference  
684 between A- and B-points affects goal choice as a function of the number of trials remaining in the  
685 miniblock. If participants rely on a fixed strategy preference when far from the goal, there should be  
686 no effect of absolute score difference on goal choice at the start of miniblocks. In this model the  
687 depended variable was goal choice (1 = g2, 0 = g1) and the predictors were absolute score difference  
688 ( $|Pts_t^A - Pts_t^B| \in [0..15]$ ), miniblock-half (1 = trial 1-7, 0 = trial 8-15) and the interaction term  
689 absolute score difference\*miniblock-half. There was a significant main effect of absolute score  
690 difference ( $\beta = 0.14$ ,  $SE = 0.008$ ,  $p < 0.001$ ) and miniblock-half ( $\beta = 0.29$ ,  $SE = 0.039$ ,  $p < 0.001$ ).  
691 Importantly, the analysis revealed a significant interaction between miniblock-half and absolute score  
692 difference ( $\beta = -0.2$ ,  $SE = 0.013$ ,  $p < 0.001$ ). This means that goal choice was more affected by the  
693 absolute score difference in the second half the miniblock compared to the first half. The analysis  
694 supports our conclusion that participants relied on a heuristic strategy preference when far from the  
695 goal.

## 696 Discussion

697 In the current study, we investigated how humans change the way they decide what goal to pursue  
698 while approaching two potential goals. To emulate real life temporally extended decision making  
699 scenarios of goal pursuit, we used a novel sequential decision making task. In this task environment,  
700 decisions of participants had deterministic consequences, but the options given to participants on  
701 each of the 15 trials were stochastic. This meant that especially during the first few trials, participants  
702 could not predict with certainty what goal was achievable. Using model-based analysis of  
703 behavioural data we find that most participants, during the initial trials, relied on computationally  
704 inexpensive heuristics and switched to forward planning only when closer to the final trial.

705 We inferred the transition from a heuristic action selection to action selection based on forward  
706 planning using a model parameter that captured participants' preference for pursuing both goals  
707 either in a sequential or parallel manner. This strategy preference had its strongest impact for the first  
708 few trials, when participants, due to the stochasticity of future offers, could not predict well which of  
709 the two available actions in a mixed trial would enable them to maximize their gain. This can be seen  
710 from Eq. 11 where two terms contribute to making a decision: the term containing the differential  
711 expected value ( $DEV$ ) and the strategy preference  $\theta$ . In our computational model, the  $DEV$  is the  
712 difference between the expected value of a sequential strategy choice and a parallel strategy choice.  
713 The  $DEV$  enables the agent to choose actions which maximize the average reward gain in a  
714 miniblock (see methods). Critically, this  $DEV$  is typically close to 0 in the first few trials, i.e. there is  
715 high uncertainty on what action is the best one. In this situation, the strategy preference mostly  
716 determines the action selection of the agent. In our model, we computed the  $DEV$  by using forward  
717 planning, where the agent hypothetically runs simulations through all remaining future trials until the  
718 end of a miniblock, i.e. to the 15<sup>th</sup> trial. The number of state space trajectories to be considered in  
719 these simulations scales exponentially with the number of remaining trials – and so does in principle  
720 the computational costs needed to simulate these trajectories. Therefore, full forward planning would

721 be both prohibitively costly and potentially useless when the deadline is far away, rendering simpler  
722 heuristics [16] the more appropriate alternative.

723 It is an open question what heuristic participants actually used. In our model, the strategy preference  
724 parameter simply quantifies a preference for a parallel or sequential strategy and biases a  
725 participant's action selection accordingly. This may mean that participants had a prior expectation  
726 whether they are going to reach G2 or just G1. Given this prior, participants could choose their action  
727 without any forward planning. In other words, to select an action in a mixed trial, participants simply  
728 assumed that they are going to reach, for example, G2. This simplifies action selection tremendously  
729 because, under the assumption that G2 will be reached, the optimal action is to use the parallel  
730 strategy at all times. To an outside observer, a participant with a strong preference for a parallel  
731 strategy may be described as overly optimistic, as this participant would choose g2-choices even if  
732 reaching G2 is not very likely, e.g. in the hard condition. Conversely, a participant with a strong  
733 preference for a sequential strategy may be described as too cautious, e.g. because that participant  
734 chooses one-goal actions in the easy condition (see S12 Fig for two example participants).  
735 Importantly, the difference in total reward between the agent and the participants is only about 5%  
736 (see Fig 3, E). This means that even though participants used a potentially suboptimal strategy  
737 preference, the impact on total reward is not that large. This is because, as we have shown, later in  
738 the miniblock, when *DEVs* become larger and are more predictive of what goal can be reached,  
739 participants choose their actions accordingly. Although we do not quantify the relative costs of full  
740 forward planning versus the observed mixture of heuristic and forward planning, we assume that an  
741 average loss of 5% of the earnings is small as compared to the reduction of computational costs when  
742 using heuristics.

743 There were two important features of our sequential decision making task: The first was that we used  
744 a rather long series of 15 trials to model multiple goal pursuit, where typically sequential decision  
745 making tasks would use fewer trials, e.g. 2 in the two-step task [32] with common values around 5  
746 [21] to 8 trials [7, 8] per miniblock. The reason why we chose a rather large number of trials is that  
747 this effectively precluded the possibility that participants can plan forward and ensure that  
748 participants were exposed at least to some initial trials where they had to rely on other information  
749 than forward planning. This initial period when participants have to select actions without an accurate  
750 estimate of the future consequences of these actions is potentially most interesting for studying meta-  
751 decisions about how we use heuristics when detailed information about goal reaching probabilities is  
752 scarce. It is probably in this period of uncertainty during goal reaching, when internal beliefs and  
753 preferences have their strongest influence.

754 The second important feature of our task was that participants had to prioritize between two goals.  
755 This is a departure from most sequential decision making tasks, where there is typically a single goal,  
756 e.g. to collect a minimum number of points, where the alternative is a fail [7]. In our task,  
757 participants could reach one of two goals, which enables addressing questions about how participants  
758 select and pursue a specific goal, see also [9]. Our findings complement work investigating  
759 behavioural strategies for pursuing multiple goals, e.g. [33], showing that pursuit strategies depend  
760 on environmental characteristics, subjective preferences and changes in context when getting closer  
761 to the goal. In line with our findings, a recent study [34] showed that decisions whether to redress the  
762 imbalance between two assets or to focus on a distinct asset during sequential goal pursuit were best  
763 fit by a dynamic programming model with a limited time horizon of 7.5 trials (20 trials would be the  
764 optimum). In future research, the pursuit of multiple goals in sequential decision making tasks may  
765 also be a basis for addressing questions about cognitive control during goal-reaching, e.g. how

766 participants regulate the balance between stable maintenance and flexible updating of goal  
767 representations [35].

768 Another important factor when modelling the use of forward planning is that complexity and time  
769 can, in principle be dissociated. For example, a temporally distant goal might have only low planning  
770 complexity because one must consider only a few decision sequences leading to the goal.  
771 Conversely, a temporally proximate goal might have high planning complexity because of a large  
772 number of potential actions sequences that may lead to the goal. In future research, by testing  
773 sequential tasks with varying branching factor (number of potential actions in each trial) one could  
774 selectively test how time to goal and planning complexity influence the arbitration of forward  
775 planning and the use of heuristics.

776 It is unclear what mechanism made participants actually use a strategy preference different from zero  
777 in our task. It is tempting to assume that participants might have used their usual approach, which  
778 they might apply in similar real-life situations, to select their goal strategies when the computational  
779 costs of forward planning are high and the prediction accuracy is low. In other words, participants  
780 who had a preference for a parallel strategy might either show a tendency towards working on  
781 multiple goals at the same time or entertain the belief that tasks should be approached with an  
782 optimistic stance. Conversely, participants with a preference for a sequential strategy might have  
783 made good experiences with using a more cautious approach and would tend to pursue one goal after  
784 the other.

785 We would like to note that the proposed model does not explicitly model the arbitration between  
786 forward planning and heuristic decision making. The computational model to fit participant  
787 behaviour uses at its core full forward planning as the optimal agent does. The effect of strategy  
788 preference just changes the action selection result, but the underlying computation to determine the  
789 *DEV* is still based on forward planning. Clearly, if a real agent used our model, this agent would not  
790 save any computations because forward planning is still used for all trials. The open question is how  
791 an agent makes a meta-decision to not use goal-directed forward planning but to rely on heuristics  
792 and other cost-efficient action selection procedures [11]. To make this meta-decision, an agent cannot  
793 rely on the *DEV* because this value is computed by forward planning. An alternative way would be to  
794 use an agent's prior experience to decide that the goal is still too temporally distant to make an  
795 informed decision with an acceptable computational cost. Such a meta-decision would depend on  
796 several factors, e.g. the relevance of reaching G2, intrinsic capability and motivation of planning  
797 forward, or a temporal distance parameter which signals urgency to start planning forward. In the  
798 future we plan to develop such meta-decision-making models and predict the moment at which  
799 forward planning takes over the action selection process.

800 It is also possible that participants use, apart from simple heuristics, other approximate planning  
801 strategies to reduce computational costs. For example, one could sample only a subset of sequences  
802 to compute value estimates. Indeed, in another study it was found that participants prune a part of the  
803 decision tree in response to potential losses, even if this pruning was suboptimal [36]. Another  
804 important point is that the planning process itself might be error-prone and therefore value  
805 calculations over longer temporal horizons may be noisier. This could presumably account for  
806 temporal modulations of the precision parameter  $\beta$ . In future work one could test for evidence of  
807 alternative planning algorithms that allow to sample subsets of (noisy) forward planning trajectories  
808 to further delineate how humans deal with computational complexity in goal-directed decision  
809 scenarios.

810 Taken together, the present research shows that over prolonged goal-reaching periods, individuals  
811 tend to behave in a way that approaches the behaviour of an optimal agent, with noticeable  
812 differences early in the goal-reaching period, but nearly optimal behaviour when the goal is close. It  
813 also highlights the potential of computational modelling to infer the decision parameters individuals  
814 use during different stages of sequential decision-making. Such models may be a promising means to  
815 further elucidate the dynamics of decision-making in the pursuit of both laboratory and everyday life  
816 goals.

## 817 **References**

- 818 1. Schmidt AM, DeShon RP. What to do? The effects of discrepancies, incentives, and time on dynamic  
819 goal prioritization. *Journal of Applied Psychology*. 2007;92(4):928.
- 820 2. Schmidt AM, Dolis CM. Something's got to give: The effects of dual-goal difficulty, goal progress, and  
821 expectancies on resource allocation. *Journal of Applied Psychology*. 2009;94(3):678.
- 822 3. Neal A, Ballard T, Vancouver JB. Dynamic Self-Regulation and Multiple-Goal Pursuit. *Annual Review of*  
823 *Organizational Psychology and Organizational Behavior*. 2017;4:401-23.
- 824 4. Schacter DL, Addis DR, Hassabis D, Martin VC, Spreng RN, Szpunar KK. The future of memory:  
825 remembering, imagining, and the brain. *Neuron*. 2012;76(4):677-94.
- 826 5. Hayes-Roth B, Hayes-Roth F. A cognitive model of planning. *Cognitive science*. 1979;3(4):275-310.
- 827 6. Economides M, Guitart-Masip M, Kurth-Nelson Z, Dolan RJ. Anterior cingulate cortex instigates  
828 adaptive switches in choice by integrating immediate and delayed components of value in  
829 ventromedial prefrontal cortex. *J Neurosci*. 2014;34(9):3340-9. Epub 2014/02/28. doi:  
830 10.1523/JNEUROSCI.4313-13.2014. PubMed PMID: 24573291; PubMed Central PMCID:  
831 PMCPMC3935091.
- 832 7. Kolling N, Wittmann M, Rushworth MFS. Multiple neural mechanisms of decision making and their  
833 competition under changing risk pressure. *Neuron*. 2014;81(5):1190-202. Epub 2014/03/13. doi:  
834 10.1016/j.neuron.2014.01.033. PubMed PMID: 24607236; PubMed Central PMCID:  
835 PMCPMC3988955.
- 836 8. Schwartenbeck P, FitzGerald TH, Mathys C, Dolan R, Friston K. The Dopaminergic Midbrain Encodes  
837 the Expected Certainty about Desired Outcomes. *Cereb Cortex*. 2015;25(10):3434-45. Epub  
838 2014/07/25. doi: 10.1093/cercor/bhu159. PubMed PMID: 25056572; PubMed Central PMCID:  
839 PMCPMC4585497.
- 840 9. Ballard T, Yeo G, Neal A, Farrell S. Departures from optimality when pursuing multiple approach or  
841 avoidance goals. *Journal of Applied Psychology*. 2016;101(7):1056.
- 842 10. Gershman SJ, Horvitz EJ, Tenenbaum JB. Computational rationality: A converging paradigm for  
843 intelligence in brains, minds, and machines. *Science*. 2015;349(6245):273-8.
- 844 11. Boureau Y-L, Sokol-Hessner P, Daw ND. Deciding how to decide: self-control and meta-decision  
845 making. *Trends in cognitive sciences*. 2015;19(11):700-10.
- 846 12. Shenhav A, Botvinick MM, Cohen JD. The expected value of control: an integrative theory of anterior  
847 cingulate cortex function. *Neuron*. 2013;79(2):217-40.
- 848 13. Shenhav A, Musslick S, Lieder F, Kool W, Griffiths TL, Cohen JD, et al. Toward a rational and  
849 mechanistic account of mental effort. *Annual review of neuroscience*. 2017;40:99-124.
- 850 14. Lieder F, Griffiths TL. Strategy selection as rational metareasoning. *Psychological Review*.  
851 2017;124(6):762.



- 852 15. Gigerenzer G, Gaissmaier W. Heuristic decision making. *Annual review of psychology*. 2011;62:451-  
853 82.
- 854 16. Soltani A, Khorsand P, Guo C, Farashahi S, Liu J. Neural substrates of cognitive biases during  
855 probabilistic inference. *Nature communications*. 2016;7:11393.
- 856 17. Keramati M, Smittenaar P, Dolan RJ, Dayan P. Adaptive integration of habits into depth-limited  
857 planning defines a habitual-goal-directed spectrum. *Proceedings of the National Academy of  
858 Sciences*. 2016;113(45):12868-73.
- 859 18. Kleiner M, Brainard D, Pelli D, Ingling A, Murray R, Broussard C. What's new in Psychtoolbox-3.  
860 *Perception*. 2007;36(14):1.
- 861 19. Ostwald D, Bruckner R, Heekeren H. Computational mechanisms of human state-action-reward  
862 contingency learning under perceptual uncertainty. *Conference on Cognitive Computational  
863 Neuroscience*; 2018; Philadelphia, Pennsylvania, USA2018.
- 864 20. Puterman ML. *Markov decision processes: discrete stochastic dynamic programming*: John Wiley &  
865 Sons; 2014.
- 866 21. Korn CW, Bach DR. Heuristic and optimal policy computations in the human brain during sequential  
867 decision-making. *Nature communications*. 2018;9(1):325.
- 868 22. Seabold S, Perktold J, editors. *Statsmodels: Econometric and statistical modeling with python*.  
869 *Proceedings of the 9th Python in Science Conference*; 2010: Scipy.
- 870 23. Team RC. *R: A language and environment for statistical computing*. 2013.
- 871 24. Bates D, Mächler M, Bolker B, Walker S. Fitting linear mixed-effects models using lme4. *arXiv preprint  
872 arXiv:14065823*. 2014.
- 873 25. Kuznetsova A, Brockhoff PB, Christensen RHB. lmerTest package: tests in linear mixed effects models.  
874 *Journal of Statistical Software*. 2017;82(13).
- 875 26. Hoffman MD, Blei DM, Wang C, Paisley J. Stochastic variational inference. *The Journal of Machine  
876 Learning Research*. 2013;14(1):1303-47.
- 877 27. Bingham E, Chen JP, Jankowiak M, Obermeyer F, Pradhan N, Karaletsos T, et al. Pyro: Deep universal  
878 probabilistic programming. *arXiv preprint arXiv:181009538*. 2018.
- 879 28. Paszke A, Gross S, Chintala S, Chanan G, Yang E, DeVito Z, et al. Automatic differentiation in pytorch.  
880 2017.
- 881 29. Polson NG, Scott JG. Shrink globally, act locally: Sparse Bayesian regularization and prediction.  
882 *Bayesian statistics*. 2010;9:501-38.
- 883 30. Bernardo J, Bayarri M, Berger J, Dawid A, Heckerman D, Smith A, et al., editors. Non-centered  
884 parameterisations for hierarchical models and data augmentation. *Bayesian Statistics 7: Proceedings  
885 of the Seventh Valencia International Meeting*; 2003: Oxford University Press, USA.
- 886 31. Talts S, Betancourt M, Simpson D, Vehtari A, Gelman A. Validating Bayesian inference algorithms with  
887 simulation-based calibration. *arXiv preprint arXiv:180406788*. 2018.
- 888 32. Daw ND, Gershman SJ, Seymour B, Dayan P, Dolan RJ. Model-based influences on humans' choices  
889 and striatal prediction errors. *Neuron*. 2011;69(6):1204-15.
- 890 33. Orehek E, Vazeou-Nieuwenhuis A. Sequential and concurrent strategies of multiple goal pursuit.  
891 *Review of General Psychology*. 2013;17(3):339.
- 892 34. Juechems K, Balaguer J, Castañón SH, Ruz M, O'Reilly JX, Summerfield C. A network for computing  
893 value equilibrium in the human medial prefrontal cortex. *Neuron*. 2019;101(5):977-87. e3.



- 894 35. Goschke T. Dysfunctions of decision-making and cognitive control as transdiagnostic mechanisms of  
 895 mental disorders: advances, gaps, and needs in current research. *International journal of methods in*  
 896 *psychiatric research*. 2014;23(S1):41-57.
- 897 36. Huys QJ, Eshel N, O'Nions E, Sheridan L, Dayan P, Roiser JP. Bonsai trees in your head: how the  
 898 Pavlovian system sculpts goal-directed choices by pruning decision trees. *PLoS computational*  
 899 *biology*. 2012;8(3):e1002410.

900

## 901 Supporting information

902 **S1 Table. Classification of accept-wait responses into either two-goal-choices (g2) or one-goal-**  
 903 **choices (g1).**

| Offer | Points                   | Response | Classification |
|-------|--------------------------|----------|----------------|
| Ab    | $Pts_t^A - Pts_t^B > 1$  | accept   | g1             |
| Ab    | $Pts_t^A - Pts_t^B > 1$  | wait     | g2             |
| Ab    | $Pts_t^A - Pts_t^B < -1$ | accept   | g2             |
| Ab    | $Pts_t^A - Pts_t^B < -1$ | wait     | g1             |
| Ab    | $Pts_t^A - Pts_t^B = 1$  | accept   | g1             |
| Ab    | $Pts_t^A - Pts_t^B = 1$  | wait     | g2             |
| Ab    | $Pts_t^A - Pts_t^B = -1$ | accept   | nan            |
| Ab    | $Pts_t^A - Pts_t^B = -1$ | wait     | nan            |
| Ab    | $Pts_t^A - Pts_t^B = 0$  | accept   | g1             |
| Ab    | $Pts_t^A - Pts_t^B = 0$  | wait     | g2             |
| aB    | $Pts_t^A - Pts_t^B > 1$  | accept   | g2             |
| aB    | $Pts_t^A - Pts_t^B > 1$  | wait     | g1             |
| aB    | $Pts_t^A - Pts_t^B < -1$ | accept   | g1             |
| aB    | $Pts_t^A - Pts_t^B < -1$ | wait     | g2             |
| aB    | $Pts_t^A - Pts_t^B = 1$  | accept   | nan            |
| aB    | $Pts_t^A - Pts_t^B = 1$  | wait     | nan            |
| aB    | $Pts_t^A - Pts_t^B = -1$ | accept   | g1             |
| aB    | $Pts_t^A - Pts_t^B = -1$ | wait     | g2             |
| aB    | $Pts_t^A - Pts_t^B = 0$  | accept   | g1             |
| aB    | $Pts_t^A - Pts_t^B = 0$  | wait     | g2             |

904

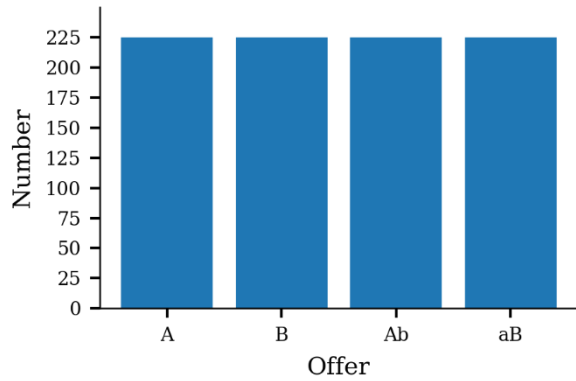

905

906 **S1 Fig. Occurrence of offer types across all 900 trials.**

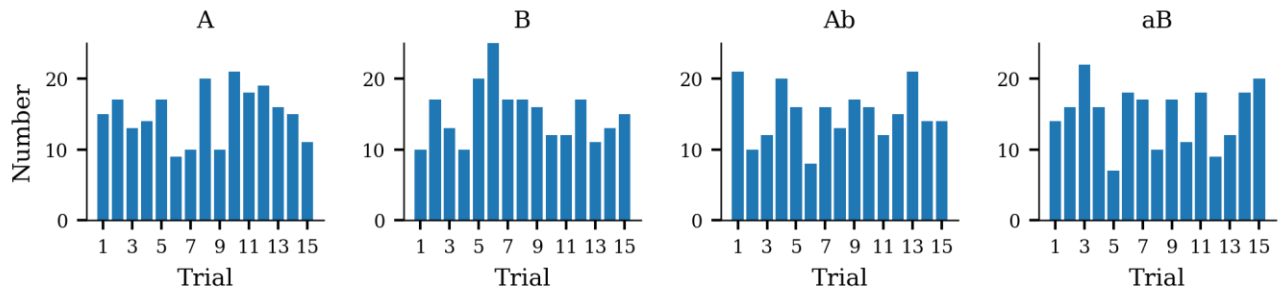

907

908 **S2 Fig. Occurrence of offer types binned with respect to trial.**

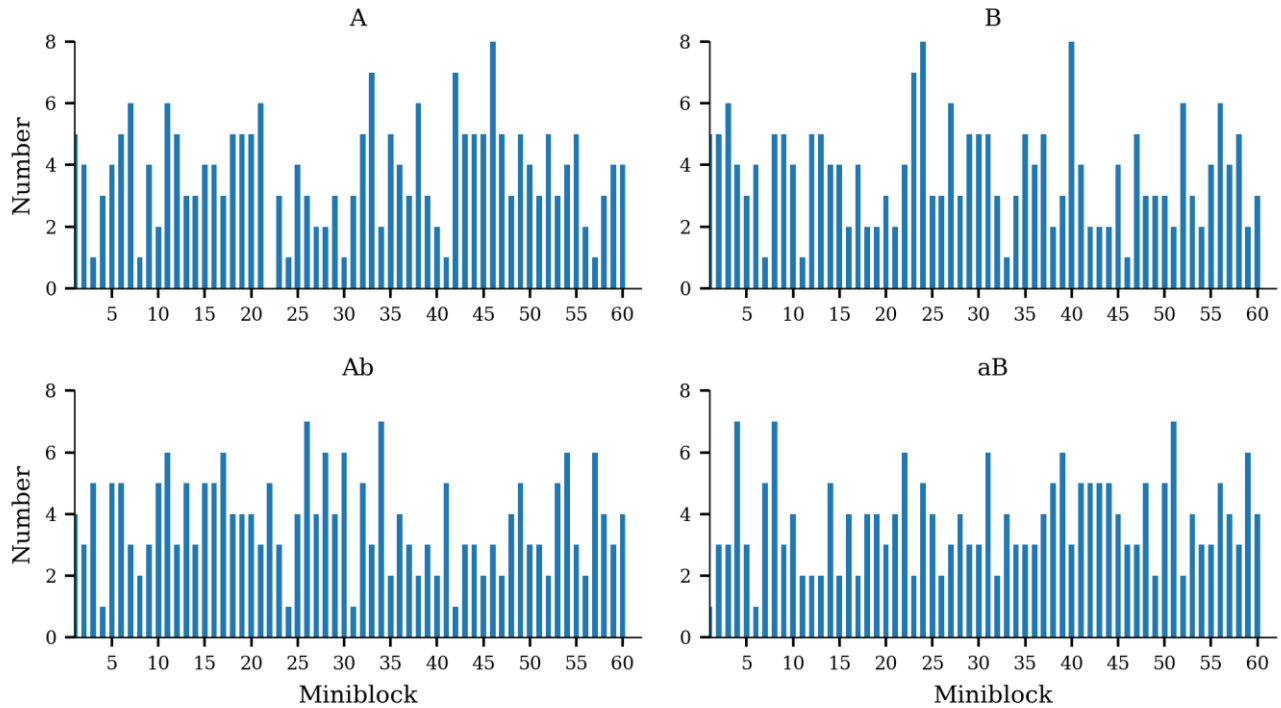

909

910 **S3 Fig. Occurrence of offer types binned with respect to miniblock.**

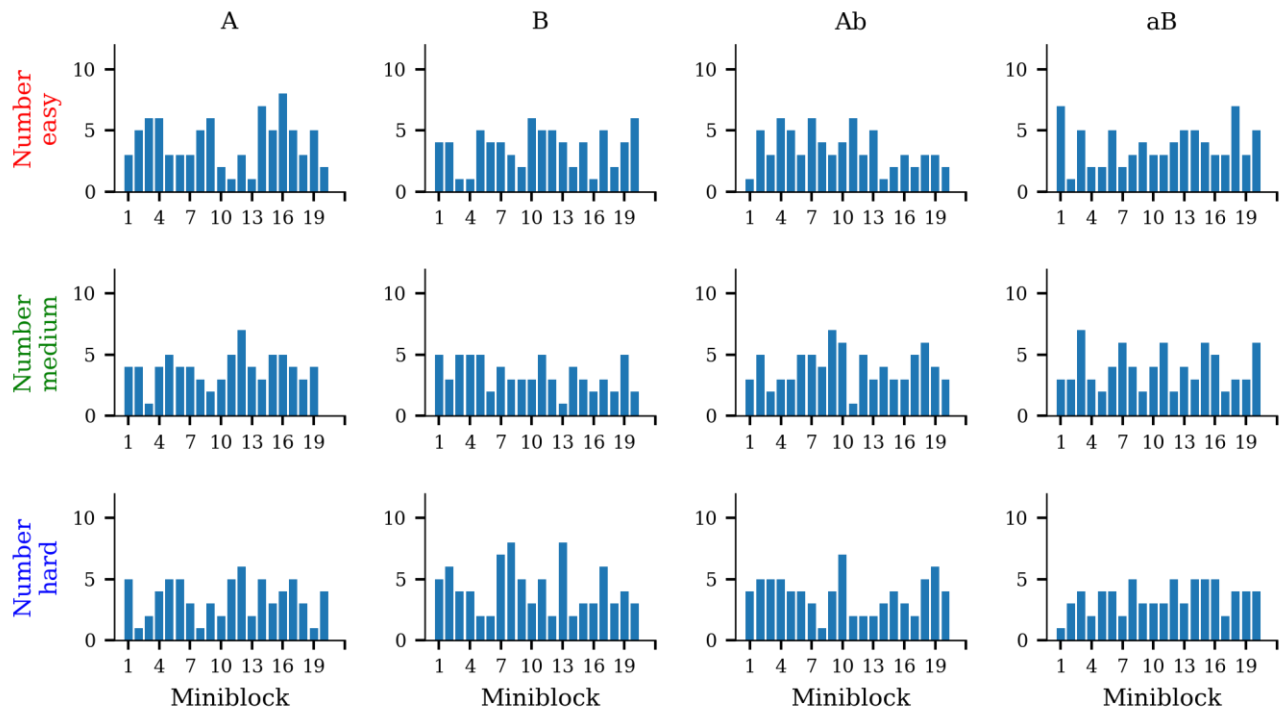

911

912 **S4 Fig. Occurrence of offer types binned with respect to miniblock and difficulty.**

913

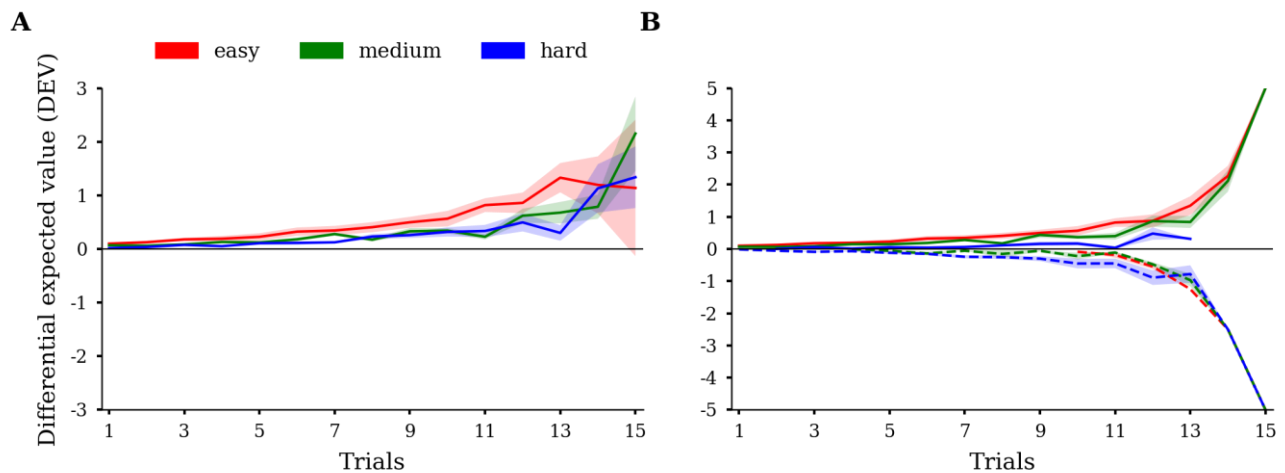

914

915 **S5 Fig. Average absolute (A) and signed (B) differential expected value (DEV) per trial and**  
 916 **condition.** Discount and reward ratio had been fixed ( $\gamma = 1$ ,  $\kappa = 1$ ). Average absolute DEVs at the  
 917 beginning of the miniblock are smaller than in the end, indicating the relative importance of decisions  
 918 close to the final trial of miniblocks. Conditions are colour coded. The shaded areas represent SD.

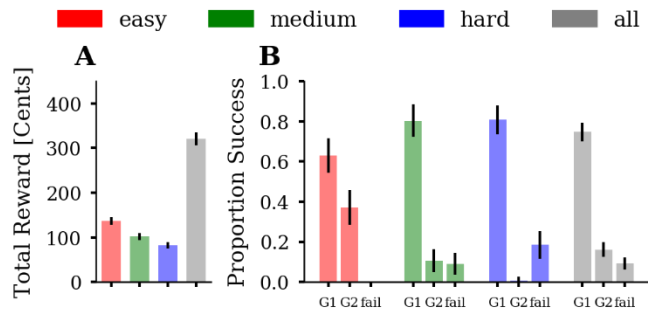

919

920 **S6 Fig. Simulated goal success and total reward of a random agent that always accepts basic**  
 921 **offers but guesses for mixed offers ( $\theta = 0, \beta \rightarrow 0, \gamma = 1, \kappa = 1$ ).** (A) Average total reward across  
 922 agent instances ( $n = 1000$ ). (B) Proportion of successful goal-reaching, averaged across agent  
 923 instances, for each of the three conditions. We plot the proportion of reaching, at the end of a  
 924 miniblock, a single goal (G1), both goals (G2), or no goal (fail). The random agent achieves fewer  
 925 G2-successes in easy and medium than the participants but fails more often in medium and hard. The  
 926 three conditions are colour-coded (easy = red, medium = green, blue = hard) and the average over  
 927 conditions is shown in grey. Error bars depict SD.

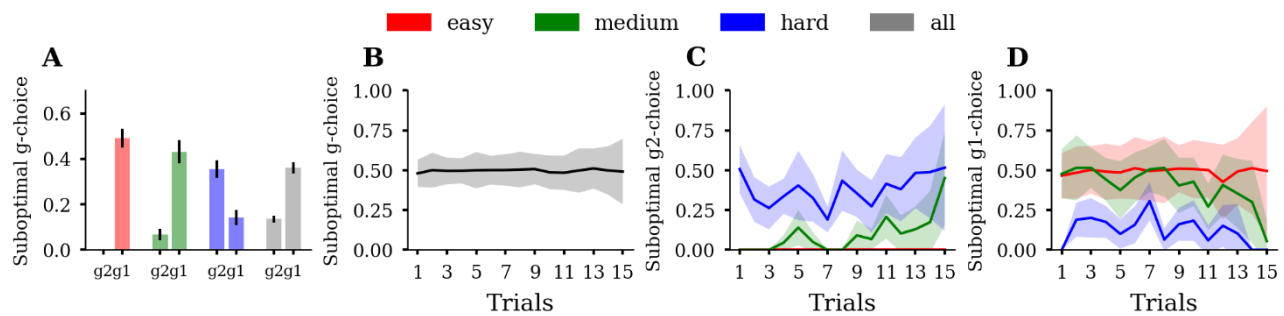

928

929 **S7 Fig. Simulated suboptimal g-choices of a random agent that always accepts basic offers but**  
 930 **guesses for mixed offers ( $\theta = 0, \beta \rightarrow 0, \gamma = 1, \kappa = 1$ ).** (A) Proportions of suboptimal g1-choices  
 931 (g1) and suboptimal g2-choices (g2), averaged over agent instances ( $n = 1000$ ). The random agent  
 932 makes many suboptimal g1-choices in the easy and medium and many suboptimal g2-choices in the  
 933 hard conditions. Summing together g1 and g2 yields approximately 50% suboptimal g-choices. (B)  
 934 Suboptimal g-choices as a function of trial averaged over agent instances. The random agent makes  
 935 approximately 50% suboptimal g-choices across all trials in the miniblock. If participants use non-  
 936 random response strategies, i.e. planning or heuristics, their pattern of suboptimality across trials  
 937 should deviate from the straight-line pattern of the random agent. (C) Suboptimal g2-choices as a  
 938 function of trial averaged over agent instances. (D) Suboptimal g1-choices as a function of trial  
 939 averaged over agent instances. Summing together g1 (D) and g2 (C) yields approximately 50%  
 940 suboptimal g-choices across trials. Error bars and shaded areas depict SD. Conditions are colour  
 941 coded.

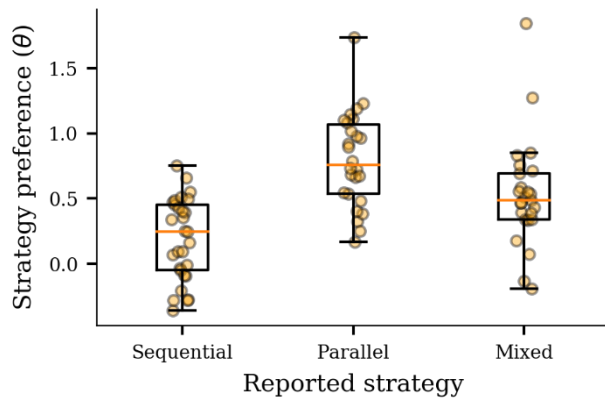

942

943 **S8 Fig. Qualitative comparison of participants' reported strategy use and fitted strategy**  
 944 **preference parameter.** Participants who reported the use of a sequential strategy had lower  
 945 estimated strategy preference, including the most negative values, than participants who reported the  
 946 use of a parallel strategy. Participants who reported mixed use of a parallel and sequential strategy  
 947 had greater strategy preference than the sequential group but lower estimates than the parallel group.  
 948 The plot shows 80 of 89 participants whose verbal reports matched with one of the three strategy  
 949 categories.

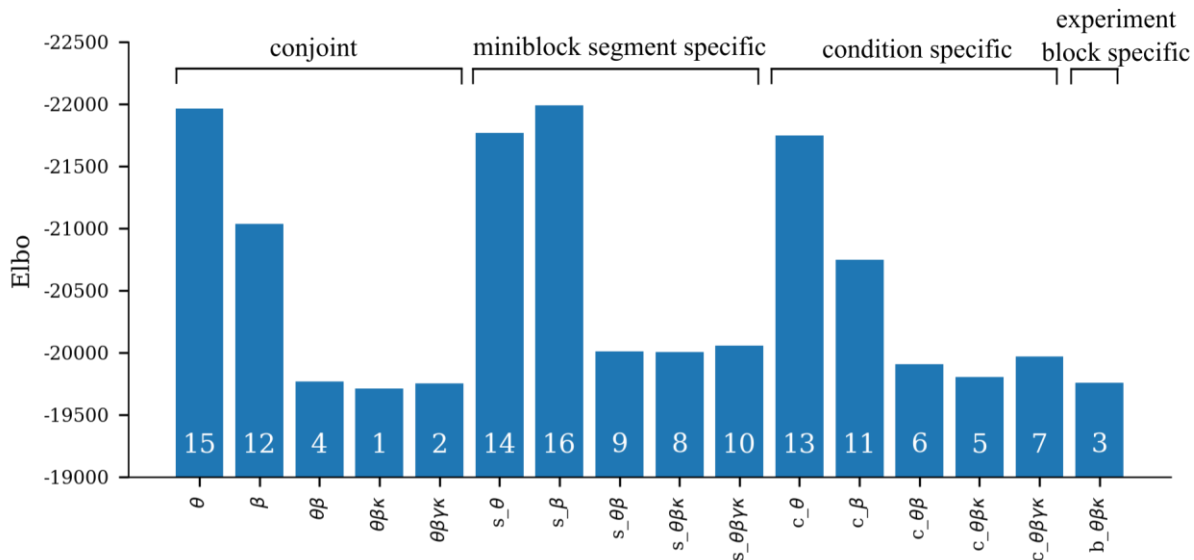

950

951 **S9 Fig. Comparing Elbo (evidence lower bound) between different model variants.** White  
 952 numbers represent the rank from highest to lowest Elbo. Model comparisons showed that the three  
 953 parameter model ( $\theta, \beta, \kappa$ ) had the highest model evidence. Adding  $\gamma$  did not increase model evidence  
 954 ( $elbo_{\theta\beta\kappa} - elbo_{\theta\beta\gamma\kappa} = -44$ ). Estimating model parameters separately for miniblock segments (trial  
 955 1-5, trial 6-10, trial 11-15; prefix 's\_' in the figure) had lower model evidence compared to the  
 956 winning model ( $elbo_{\theta\beta\kappa} - elbo_{s_\theta\beta\kappa} = -294$ ). Estimating model parameters separately for  
 957 conditions (easy, medium, hard; prefix 'c' in the figure) had lower model evidence compared to the  
 958 winning model ( $elbo_{\theta\beta\kappa} - elbo_{c_\theta\beta\kappa} = -94$ ). Estimating model parameters separately for  
 959 experiment blocks (miniblock 1-20, miniblock 21-40, miniblock 41-60; prefix 'b' in the figure) had  
 960 also lower model evidence compared to the winning model ( $elbo_{\theta\beta\kappa} - elbo_{s_\theta\beta\kappa} = -48$ ). Bars in  
 961 the plot depict Elbo averaged over the last 20 posterior samples.

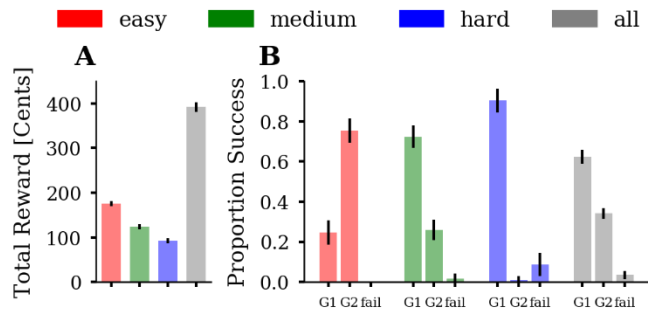

962

963 **S10 Fig. Posterior predictive checks: Simulated goal success and total reward closely resemble**  
 964 **observed participant behaviour.** (A) Average total reward across samples ( $n = 1,000$ ). (B)  
 965 Proportion of successful goal-reaching, averaged across samples, for each of the three conditions. We  
 966 plot the proportion of reaching, at the end of a miniblock, a single goal (G1), both goals (G2), or no  
 967 goal (fail). The three conditions are colour-coded (easy = red, medium = green, blue = hard) and the  
 968 average over conditions is shown in grey. Error bars depict SD. Data were generated using 1,000  
 969 posterior samples from the group hyper parameters.

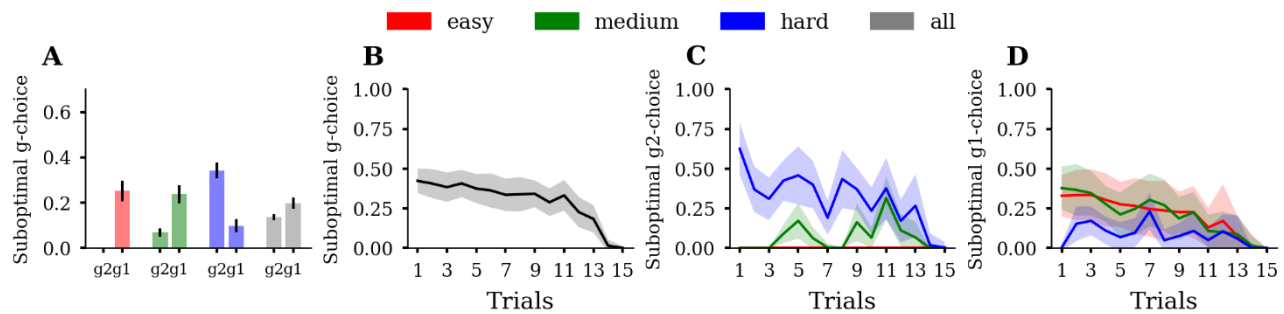

970

971 **S11 Fig. Posterior predictive checks: Simulated suboptimal g-choices closely resemble**  
 972 **observed participant behaviour.** (A) Proportions of suboptimal g1-choices (g1) and suboptimal g2-  
 973 choices (g2), averaged over samples ( $n = 1,000$ ). (B) Suboptimal g-choices as a function of trial  
 974 averaged over samples. (C) Suboptimal g2-choices as a function of trial averaged over samples. (D)  
 975 Suboptimal g1-choices as a function of trial averaged over samples. Error bars and shaded areas  
 976 depict SD. Conditions are colour coded. Data were generated using 1,000 posterior samples from the  
 977 group hyper parameters.

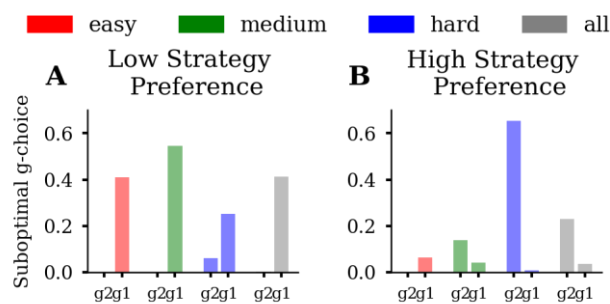

978

979 **S12 Fig. Comparison of suboptimal g-choices between a low strategy preference and high**  
 980 **strategy preference participant.** The plot shows proportions of suboptimal g1-choices (g1) and  
 981 suboptimal g2-choices (g2) (A) of the participant with the lowest fitted strategy preference ( $\theta =$



982  $-0.36$ ) and **(B)** of the participant with the highest fitted strategy preference ( $\theta = 1.84$ ). The low  
983 strategy preference participant prefers a sequential strategy leading to suboptimal g1-choices in the  
984 easy and medium condition. The participant with a high strategy preference parameter prefers a  
985 parallel strategy, resulting in a few suboptimal g1-choices in easy in and medium but a large number  
986 of suboptimal g2-choices in the hard condition.

### 987 **S1 Text: Task instructions (translated from German)**

988 Dear participant,  
989 your task in this experiment is to reach goals. Within a block, consisting of 15 trials, you can either  
990 reach goal A, goal B or both goals at the same time. For one reached goal you will gain additional 5  
991 Cents and for two reached goals additional 10 Cents. Your task is to obtain as much money as  
992 possible.

993 To reach goals, you must collect points. You can get points by accepting an offer. Some offers  
994 however, might have a negative effect on the state of a goal. Your task is to decide in every trial,  
995 whether to accept an offer or wait for the next offer. Press “up arrow” to accept an offer and “down  
996 arrow” to wait.

997 Important: Please decide deliberately but speedily. If you decide too slowly, you will get a  
998 notification. After every 5 notifications, 50 Cents will be subtracted from your bonus-payout. (The  
999 experiment starts with a training phase, in which no money can be lost.)

1000 More about the goals:

1001 Your goal progress will be represented by a bar, which is labelled with A or B. A goal counts as  
1002 achieved, if one of the bars reaches or surpasses the white horizontal mark. The goal state will be  
1003 evaluated after the end of the 15 trials.

1004 More about the offers:

1005 There are 4 different offers – A, B, Ab and aB. All offers have the same occurrence probability of  
1006 25%. The offers differ with respect to their effect on the goal state. A increases the A-bar by one  
1007 point. B increases the B-bar by one point. Ab increases the A-bar by one point and subtracts one  
1008 point from the B-bar. aB increases the B-bar by one point and subtracts 1 point from the A-bar.

1009 Initial conditions:

1010 At the beginning of the block, you already have some A- and B-points. The amount of initial points  
1011 varies from block to block.

1012 **S1 Movie. Simulated goal success and total reward where the precision parameter  $\beta$  varies**  
1013 **between 0.25 and 3 with  $\theta$ ,  $\gamma$ , and  $\kappa$  sampled from their fitted population mean. (A)** Average  
1014 total reward across agent instances ( $n = 1,000$ ). An increase in  $\beta$  increases total reward obtained in the  
1015 easy and medium but decreases total reward in the hard condition. **(B)** Proportion of successful goal-  
1016 reaching, averaged across agent instances, for each of the three conditions. We plot the proportion of  
1017 reaching, at the end of a miniblock, a single goal (G1), both goals (G2), or no goal (fail). An increase  
1018 in  $\beta$  increases G2 success rate in easy and medium but also increases fail rate in medium and hard.  
1019 The three conditions are colour-coded (easy = red, medium = green, blue = hard) and the average  
1020 over conditions is shown in grey. Error bars depict SD.

1021

1022 **S2 Movie. Simulated suboptimal g-choices where the precision parameter  $\beta$  varies between**  
1023 **0.25 and 3 with  $\theta$ ,  $\gamma$ , and  $\kappa$  sampled from their fitted population mean. (A)** Proportions of  
1024 suboptimal g1-choices (g1) and suboptimal g2-choices (g2), averaged over agent instances (n  
1025 =1000). An increase in  $\beta$  decreases suboptimal g1- and g2-choices. **(B)** Suboptimal g-choices as a  
1026 function of trial averaged over agent instances. The influence of  $\beta$  and the associated decrease of  
1027 suboptimal g-choices successively increases towards the end of the miniblock. Suboptimal g-choices  
1028 in the first half of the miniblock are largely unaffected by the  $\beta$  parameter. **(C)** Suboptimal g2-  
1029 choices as a function of trial averaged over agent instances. An increase in  $\beta$  decreases suboptimal  
1030 g2-choices late in the miniblock in medium and hard but not in easy. **(D)** Suboptimal g1-choices as a  
1031 function of trial averaged over agent instances. An increase in  $\beta$  decreases suboptimal g1-choices late  
1032 in the miniblock in easy and medium but not in hard. Error bars and shaded areas depict SD.  
1033 Conditions are colour coded.

1034 **S3 Movie. Simulated goal success and total reward where the strategy preference parameter  $\theta$**   
1035 **varies between -1 and 1 with  $\beta$ ,  $\gamma$ , and  $\kappa$  sampled from their fitted population mean. (A)**  
1036 Average total reward across agent instances (n =1000). An increase in  $\theta$  increases total reward  
1037 obtained in easy and medium but decreases total reward in hard. **(B)** Proportion of successful goal-  
1038 reaching, averaged across agent instances, for each of the three conditions. We plot the proportion of  
1039 reaching, at the end of a miniblock, a single goal (G1), both goals (G2), or no goal (fail). An increase  
1040 in  $\theta$  increases G2 success rate in easy and medium but also increases fail rate in medium and hard.  
1041 The three conditions are colour-coded (easy = red, medium = green, blue = hard) and the average  
1042 over conditions is shown in grey. Error bars depict SD.

1043 **S4 Movie. Simulated suboptimal g-choices where the strategy preference parameter  $\theta$  varies**  
1044 **between -1 and 1 with  $\beta$ ,  $\gamma$ , and  $\kappa$  sampled from their fitted population mean. (A)** Proportions of  
1045 suboptimal g1-choices (g1) and suboptimal g2-choices (g2), averaged over agent instances (n  
1046 =1000). An increase in  $\theta$  decreases suboptimal g1- choices and increases suboptimal g2-choices.  
1047 Suboptimal g1-choices decrease more in easy and medium than in hard. Suboptimal g2-choices  
1048 decrease more in hard than in easy and medium. **(B)** Suboptimal g-choices as a function of trial  
1049 averaged over agent instances. A change in  $\theta$  affects the number of suboptimal g-choices made at the  
1050 beginning but not at the end of the miniblock. For  $\theta > 0$  suboptimal g-choices further decrease,  
1051 because g2-choices are often optimal in easy and medium. **(C)** Suboptimal g2-choices as a function  
1052 of trial averaged over agent instances. An increase in  $\theta$  increases suboptimal g2-choices early in the  
1053 miniblock, predominantly in the hard condition. **(D)** Suboptimal g1-choices as a function of trial  
1054 averaged over agent instances. An increase in  $\theta$  decreases suboptimal g1-choices early in the  
1055 miniblock, predominately in easy and medium. Error bars and shaded areas depict SD. Conditions  
1056 are colour coded.

1057 **S1 Notebook. Parameter recovery simulations.**
